# Supplementary material
Source: publisher site journal article supplement (https://www.dovepress.com/article/222235)
Supplement: Supplementary file 1 [file get_supplementary_file.php]

## Supplementary Material

**S-Table 1. DEGs identified for hepatic carcinoma with metastasis vs. hepatic carcinoma with solitary tumor in PBMC samples by RNA-seq**

| <b>Gene</b>     | <b>Value 1<br/>(samples of<br/>hepatic<br/>carcinoma<br/>with<br/>metastasis)</b> | <b>Value 2<br/>(samples of<br/>hepatic<br/>carcinoma<br/>with solitary<br/>tumor)</b> | <b>Log2(fold<br/>change)</b> | <b>Test stat</b> | <b>P value</b> | <b>Q value</b> |
|-----------------|-----------------------------------------------------------------------------------|---------------------------------------------------------------------------------------|------------------------------|------------------|----------------|----------------|
| <i>HBG1</i>     | 812.674                                                                           | 1.0257                                                                                | -9.62992                     | 5.76277          | 8.27E-09       | 9.74E-06       |
| <i>SELENBP1</i> | 167.738                                                                           | 0.272452                                                                              | -9.266                       | 5.92561          | 3.11E-09       | 5.86E-06       |
| <i>HBM</i>      | 523.448                                                                           | 2.03017                                                                               | -8.0103                      | 5.26052          | 1.44E-07       | 8.56E-05       |
| <i>HBA2</i>     | 167975                                                                            | 732.425                                                                               | -7.84135                     | 10.5762          | 0              | 0              |
| <i>HBB</i>      | 215021                                                                            | 1229.46                                                                               | -7.45032                     | 10.2299          | 0              | 0              |
| <i>SLC4A1</i>   | 402.515                                                                           | 2.3351                                                                                | -7.42941                     | 4.89327          | 9.92E-07       | 0.000389       |
| <i>HBG2</i>     | 891.76                                                                            | 5.53966                                                                               | -7.33071                     | 6.16851          | 6.89E-10       | 2.16E-06       |
| <i>HBQ1</i>     | 57.6468                                                                           | 0.438609                                                                              | -7.03816                     | 4.01665          | 5.90E-05       | 0.011084       |
| <i>TUBB2A</i>   | 35.1415                                                                           | 0.279805                                                                              | -6.97261                     | 4.49721          | 6.89E-06       | 0.001752       |
| <i>AHSP</i>     | 467.205                                                                           | 3.76601                                                                               | -6.95487                     | 5.3088           | 1.10E-07       | 7.42E-05       |
| <i>SPTB</i>     | 41.2961                                                                           | 0.37106                                                                               | -6.79821                     | 5.85018          | 4.91E-09       | 6.61E-06       |
| <i>HBD</i>      | 748.669                                                                           | 7.40186                                                                               | -6.6603                      | 5.99435          | 2.04E-09       | 4.81E-06       |
| <i>CA1</i>      | 884.262                                                                           | 9.00205                                                                               | -6.61808                     | 4.0127           | 6.00E-05       | 0.011084       |
| <i>EPB42</i>    | 52.9285                                                                           | 0.572779                                                                              | -6.52992                     | 4.67021          | 3.01E-06       | 0.000977       |
| <i>TRIM58</i>   | 191.888                                                                           | 2.33279                                                                               | -6.36207                     | 5.38024          | 7.44E-08       | 6.80E-05       |
| <i>GATA1</i>    | 9.85844                                                                           | 0.136168                                                                              | -6.1779                      | 3.51571          | 0.000439       | 0.048024       |
| <i>IFIT1B</i>   | 32.5005                                                                           | 0.463841                                                                              | -6.13069                     | 4.05341          | 5.05E-05       | 0.009701       |
| <i>SLC6A8</i>   | 24.9012                                                                           | 0.371939                                                                              | -6.065                       | 4.71813          | 2.38E-06       | 0.000862       |
| <i>ANK1</i>     | 32.5233                                                                           | 0.498966                                                                              | -6.02639                     | 5.37299          | 7.74E-08       | 6.80E-05       |
| <i>TNS1</i>     | 40.1721                                                                           | 0.693556                                                                              | -5.85604                     | 5.10461          | 3.31E-07       | 0.000164       |

|                     |         |          |          |         |          |          |
|---------------------|---------|----------|----------|---------|----------|----------|
| <i>ITGB5</i>        | 10.1939 | 0.184542 | -5.78762 | 3.81381 | 0.000137 | 0.020454 |
| <i>MAPIA</i>        | 6.50837 | 0.125593 | -5.69547 | 5.11878 | 3.08E-07 | 0.000161 |
| <i>SLC25A39</i>     | 954.89  | 19.7493  | -5.59546 | 3.5527  | 0.000381 | 0.044814 |
| <i>TMCC2</i>        | 25.0906 | 0.562626 | -5.47883 | 4.65624 | 3.22E-06 | 0.000978 |
| <i>TGM2</i>         | 11.2897 | 0.254228 | -5.47273 | 3.78097 | 0.000156 | 0.022632 |
| <i>GPIBB, SEPT5</i> | 929.997 | 21.4717  | -5.43672 | 3.88824 | 0.000101 | 0.017254 |
| <i>FAM20A</i>       | 13.6511 | 0.318325 | -5.42237 | 3.82293 | 0.000132 | 0.020258 |
| <i>OSBP2</i>        | 78.6356 | 1.92472  | -5.35246 | 5.34363 | 9.11E-08 | 6.80E-05 |
| <i>ITGB3</i>        | 67.8796 | 1.67705  | -5.33898 | 3.59303 | 0.000327 | 0.041039 |
| <i>SNCA</i>         | 74.9485 | 1.9402   | -5.27162 | 4.54646 | 5.46E-06 | 0.001468 |
| <i>ITGA2B</i>       | 177.865 | 4.75529  | -5.22511 | 5.34547 | 9.02E-08 | 6.80E-05 |
| <i>PPBP</i>         | 575.538 | 15.4774  | -5.21668 | 5.20524 | 1.94E-07 | 0.000107 |
| <i>ESAM</i>         | 22.6103 | 0.611868 | -5.20761 | 4.43153 | 9.36E-06 | 0.002203 |
| <i>PHOSPHO1</i>     | 55.3969 | 1.56302  | -5.1474  | 4.91204 | 9.01E-07 | 0.000386 |
| <i>SMOX</i>         | 41.65   | 1.18511  | -5.13523 | 3.77073 | 0.000163 | 0.023224 |
| <i>GP9</i>          | 100.476 | 2.90242  | -5.11345 | 4.94666 | 7.55E-07 | 0.000355 |
| <i>MYL9</i>         | 143.89  | 4.37043  | -5.04104 | 5.33829 | 9.38E-08 | 6.80E-05 |
| <i>PEAR1</i>        | 8.5841  | 0.262167 | -5.03311 | 4.13024 | 3.62E-05 | 0.007261 |
| <i>PCSK6</i>        | 10.1015 | 0.317475 | -4.99178 | 3.54984 | 0.000385 | 0.044814 |
| <i>TREML1</i>       | 101.228 | 3.20772  | -4.97992 | 4.36519 | 1.27E-05 | 0.002917 |
| <i>ANKRD9</i>       | 29.2926 | 0.96135  | -4.92933 | 3.80305 | 0.000143 | 0.02103  |
| <i>NFIX</i>         | 11.3407 | 0.424595 | -4.73927 | 4.91406 | 8.92E-07 | 0.000386 |
| <i>C5orf4</i>       | 31.1466 | 1.16711  | -4.73807 | 4.60901 | 4.05E-06 | 0.001177 |
| <i>CSDA</i>         | 454.009 | 17.1805  | -4.72387 | 3.68633 | 0.000228 | 0.031507 |
| <i>GFI1B</i>        | 34.0899 | 1.32518  | -4.68508 | 3.66539 | 0.000247 | 0.033228 |
| <i>STRADB</i>       | 97.8276 | 3.81096  | -4.68202 | 4.52618 | 6.01E-06 | 0.001571 |
| <i>SELP</i>         | 19.353  | 0.776544 | -4.63934 | 3.869   | 0.000109 | 0.017744 |
| <i>C6orf25</i>      | 74.6923 | 3.00947  | -4.63338 | 4.24477 | 2.19E-05 | 0.004786 |

|                       |         |          |          |          |          |          |
|-----------------------|---------|----------|----------|----------|----------|----------|
| <i><b>GMPR</b></i>    | 85.4169 | 3.57837  | -4.57715 | 4.70148  | 2.58E-06 | 0.000901 |
| <i><b>DCAF12</b></i>  | 135.232 | 5.79385  | -4.54477 | 4.89762  | 9.70E-07 | 0.000389 |
| <i><b>XK</b></i>      | 15.5373 | 0.686571 | -4.50018 | 4.07678  | 4.57E-05 | 0.008959 |
| <i><b>SLC14A1</b></i> | 22.9842 | 1.05651  | -4.44326 | 3.90194  | 9.54E-05 | 0.016955 |
| <i><b>PF4</b></i>     | 674.935 | 31.5291  | -4.41999 | 5.25834  | 1.45E-07 | 8.56E-05 |
| <i><b>GNAZ</b></i>    | 9.65133 | 0.476881 | -4.33903 | 3.53262  | 0.000411 | 0.046683 |
| <i><b>ABLIM3</b></i>  | 7.89573 | 0.400935 | -4.29963 | 3.62982  | 0.000284 | 0.036588 |
| <i><b>TMEM158</b></i> | 22.5647 | 1.1503   | -4.29398 | 3.88471  | 0.000102 | 0.017254 |
| <i><b>OR2W3</b></i>   | 33.2992 | 1.70445  | -4.28811 | 3.76258  | 0.000168 | 0.023637 |
| <i><b>BPGM</b></i>    | 109.765 | 5.64616  | -4.281   | 4.56458  | 5.00E-06 | 0.001386 |
| <i><b>SPARC</b></i>   | 126.614 | 6.70829  | -4.23835 | 4.68419  | 2.81E-06 | 0.000945 |
| <i><b>GLRX5</b></i>   | 234.975 | 14.653   | -4.00324 | 4.65719  | 3.21E-06 | 0.000978 |
| <i><b>TSTA3</b></i>   | 93.4144 | 6.50445  | -3.84415 | 4.60496  | 4.13E-06 | 0.001177 |
| <i><b>GAS2L1</b></i>  | 30.4022 | 2.13388  | -3.83263 | 4.31003  | 1.63E-05 | 0.00366  |
| <i><b>CDC34</b></i>   | 72.3519 | 5.41531  | -3.73991 | 4.4538   | 8.44E-06 | 0.002037 |
| <i><b>EHD3</b></i>    | 8.54554 | 0.658273 | -3.69841 | 3.58548  | 0.000336 | 0.04169  |
| <i><b>PRKAR2B</b></i> | 42.4245 | 3.69532  | -3.52113 | 3.84897  | 0.000119 | 0.018617 |
| <i><b>UBXN6</b></i>   | 95.5743 | 9.58954  | -3.31709 | 3.57999  | 0.000344 | 0.042023 |
| <i><b>FECH</b></i>    | 15.7337 | 1.58937  | -3.30733 | 3.87704  | 0.000106 | 0.017469 |
| <i><b>FAM210B</b></i> | 80.4911 | 8.37174  | -3.26523 | 3.98036  | 6.88E-05 | 0.012462 |
| <i><b>FISI</b></i>    | 125.923 | 13.7165  | -3.19855 | 3.53356  | 0.00041  | 0.046683 |
| <i><b>SLC1A5</b></i>  | 54.9217 | 6.77411  | -3.01927 | 3.50679  | 0.000454 | 0.049094 |
| <i><b>BLVRB</b></i>   | 241.336 | 30.2994  | -2.99368 | 3.86429  | 0.000111 | 0.017782 |
| <i><b>CEBPD</b></i>   | 155.705 | 20.3404  | -2.9364  | 3.82014  | 0.000133 | 0.020258 |
| <i><b>PINK1</b></i>   | 48.7803 | 6.66918  | -2.87072 | 3.65048  | 0.000262 | 0.034235 |
| <i><b>PRDX2</b></i>   | 202.145 | 28.3151  | -2.83575 | 3.66536  | 0.000247 | 0.033228 |
| <i><b>SLC7A5</b></i>  | 20.5708 | 3.07577  | -2.74158 | 3.57148  | 0.000355 | 0.042856 |
| <i><b>CEACAM6</b></i> | 7.57604 | 63.024   | 3.05639  | -3.88434 | 0.000103 | 0.017254 |

|                  |          |          |          |          |          |          |
|------------------|----------|----------|----------|----------|----------|----------|
| <b>CD24</b>      | 9.19881  | 92.9001  | 3.33616  | -4.2399  | 2.24E-05 | 0.004786 |
| <b>FAM46A</b>    | 2.5701   | 26.6973  | 3.3768   | -4.21625 | 2.48E-05 | 0.005085 |
| <b>BACH2</b>     | 0.304472 | 4.16575  | 3.77419  | -3.60518 | 0.000312 | 0.039697 |
| <b>FOLR3</b>     | 7.21739  | 106.773  | 3.88693  | -3.54995 | 0.000385 | 0.044814 |
| <b>CRISP3</b>    | 6.69286  | 130.388  | 4.28405  | -4.75833 | 1.95E-06 | 0.000735 |
| <b>CHI3L1</b>    | 3.42326  | 70.7748  | 4.36979  | -4.45964 | 8.21E-06 | 0.002034 |
| <b>OTOF</b>      | 0.214132 | 6.47397  | 4.91808  | -3.51723 | 0.000436 | 0.048024 |
| <b>OLFM4</b>     | 2.00297  | 98.1458  | 5.61471  | -5.87188 | 4.31E-09 | 6.61E-06 |
| <b>TUBB2B</b>    | 3.73662  | 0.031866 | -6.87357 | 2.1073   | 0.035092 | 0.641907 |
| <b>ARHGAP6</b>   | 4.98774  | 0.06504  | -6.26091 | 2.90418  | 0.003682 | 0.197761 |
| <b>LOC388588</b> | 31.2841  | 0.453017 | -6.10972 | 2.8115   | 0.004931 | 0.22988  |
| <b>TMOD1</b>     | 21.5989  | 0.319301 | -6.0799  | 1.96616  | 0.04928  | 0.702983 |
| <b>EPB49</b>     | 163.532  | 2.72587  | -5.90671 | 3.24306  | 0.001183 | 0.091339 |
| <b>TNFRSF8</b>   | 4.68891  | 0.091681 | -5.67649 | 2.65403  | 0.007954 | 0.309501 |
| <b>KANK2</b>     | 5.57133  | 0.136198 | -5.35425 | 3.2993   | 0.000969 | 0.080775 |
| <b>NT5M</b>      | 8.90347  | 0.244456 | -5.18672 | 2.86351  | 0.00419  | 0.211163 |
| <b>TALI</b>      | 8.09314  | 0.225367 | -5.16635 | 3.29345  | 0.00099  | 0.081039 |
| <b>CETP</b>      | 4.22172  | 0.124614 | -5.08229 | 2.83079  | 0.004643 | 0.225393 |
| <b>MFSD2B</b>    | 15.8548  | 0.468671 | -5.0802  | 3.32698  | 0.000878 | 0.075634 |
| <b>SPTAI1</b>    | 1.94164  | 0.057663 | -5.07348 | 2.8429   | 0.004471 | 1        |
| <b>AQP10</b>     | 5.03541  | 0.156383 | -5.00896 | 2.79265  | 0.005228 | 0.234431 |
| <b>LY6G6F</b>    | 25.0289  | 0.809667 | -4.95012 | 2.86587  | 0.004159 | 0.211163 |
| <b>VWCE</b>      | 1.40727  | 0.045624 | -4.94696 | 2.73154  | 0.006304 | 1        |
| <b>SPRED2</b>    | 1.30388  | 0.043046 | -4.92079 | 2.22714  | 0.025938 | 1        |
| <b>DOCK6</b>     | 0.963408 | 0.032382 | -4.8949  | 2.24855  | 0.024541 | 1        |
| <b>BCL2L1</b>    | 221.952  | 7.59951  | -4.8682  | 3.28265  | 0.001028 | 0.082771 |
| <b>CIQB</b>      | 5.72447  | 0.203128 | -4.81668 | 2.6505   | 0.008037 | 0.310876 |
| <b>RNF208</b>    | 9.6545   | 0.359525 | -4.74704 | 3.06429  | 0.002182 | 0.136977 |

|                  |         |          |          |         |          |          |
|------------------|---------|----------|----------|---------|----------|----------|
| <i>MYO7A</i>     | 5.64827 | 0.245063 | -4.52659 | 2.42509 | 0.015305 | 0.43674  |
| <i>SPOCD1</i>    | 3.73739 | 0.164912 | -4.50226 | 2.7867  | 0.005325 | 0.237649 |
| <i>SH3TC2</i>    | 0.32145 | 0.014665 | -4.45418 | 2.46995 | 0.013513 | 1        |
| <i>PTCRA</i>     | 48.8396 | 2.24992  | -4.44011 | 3.05025 | 0.002287 | 0.14166  |
| <i>RAB3IL1</i>   | 1.30169 | 0.061033 | -4.41465 | 2.40185 | 0.016313 | 1        |
| <i>HEMGN</i>     | 17.7366 | 0.842626 | -4.3957  | 3.2149  | 0.001305 | 0.097525 |
| <i>DNAJC6</i>    | 1.11157 | 0.053181 | -4.38554 | 2.41326 | 0.015811 | 1        |
| <i>SCN1B</i>     | 5.9963  | 0.302934 | -4.30699 | 2.46844 | 0.01357  | 0.410905 |
| <i>MMRN1</i>     | 3.40083 | 0.171852 | -4.30664 | 2.80451 | 0.005039 | 0.233045 |
| <i>TUBA8</i>     | 6.20072 | 0.320689 | -4.27319 | 2.87354 | 0.004059 | 0.21002  |
| <i>HIST1H2AE</i> | 14.954  | 0.776926 | -4.26661 | 2.31461 | 0.020635 | 0.506028 |
| <i>GNAO1</i>     | 1.04964 | 0.054742 | -4.26111 | 2.06234 | 0.039175 | 1        |
| <i>TPTEP1</i>    | 19.376  | 1.03881  | -4.22126 | 3.48045 | 0.000501 | 0.051092 |
| <i>PKHD1L1</i>   | 1.15484 | 0.062305 | -4.21219 | 2.7325  | 0.006285 | 1        |
| <i>PI3</i>       | 12.2926 | 0.684109 | -4.16742 | 2.2537  | 0.024215 | 0.545531 |
| <i>CMTM5</i>     | 21.7751 | 1.22236  | -4.15494 | 3.35503 | 0.000794 | 0.070499 |
| <i>ACRBP</i>     | 90.8233 | 5.18521  | -4.13059 | 3.011   | 0.002604 | 0.157187 |
| <i>TBXA2R</i>    | 4.32024 | 0.247764 | -4.12408 | 2.51391 | 0.01194  | 0.373552 |
| <i>C14orf45</i>  | 4.69694 | 0.269893 | -4.12126 | 2.03915 | 0.041436 | 0.688301 |
| <i>HIST1H2BC</i> | 19.8255 | 1.16261  | -4.09191 | 2.20529 | 0.027434 | 0.576228 |
| <i>GYPA</i>      | 5.95811 | 0.354261 | -4.07197 | 2.63988 | 0.008294 | 0.314922 |
| <i>DNM3</i>      | 1.84927 | 0.111152 | -4.05635 | 2.34655 | 0.018948 | 1        |
| <i>PROS1</i>     | 5.33754 | 0.32442  | -4.04024 | 2.61398 | 0.008949 | 0.322898 |
| <i>SLC25A37</i>  | 259.437 | 15.8024  | -4.03717 | 2.76997 | 0.005606 | 0.247854 |
| <i>NRGN</i>      | 748.431 | 46.2736  | -4.01561 | 2.16193 | 0.030623 | 0.596224 |
| <i>FDX1L</i>     | 4.05542 | 0.261203 | -3.95661 | 2.10636 | 0.035173 | 0.641907 |
| <i>FAM212A</i>   | 3.35708 | 0.217961 | -3.94507 | 2.10022 | 0.03571  | 0.649186 |
| <i>TNXB</i>      | 0.87292 | 0.056948 | -3.93813 | 2.93383 | 0.003348 | 1        |

|                  |          |          |          |         |          |          |
|------------------|----------|----------|----------|---------|----------|----------|
| <i>TGFB11I</i>   | 8.44207  | 0.554877 | -3.92736 | 2.76418 | 0.005707 | 0.249948 |
| <i>C21orf7</i>   | 41.3678  | 2.75703  | -3.90732 | 3.26283 | 0.001103 | 0.088031 |
| <i>MYLK</i>      | 5.33893  | 0.359551 | -3.89228 | 2.81667 | 0.004852 | 0.228403 |
| <i>MRPL12</i>    | 8.89156  | 0.600518 | -3.88816 | 2.45602 | 0.014049 | 0.417831 |
| <i>GYPC</i>      | 387.949  | 26.4491  | -3.87458 | 3.44779 | 0.000565 | 0.055443 |
| <i>HIST1H3H</i>  | 68.8291  | 4.69933  | -3.87249 | 1.98706 | 0.046916 | 0.697344 |
| <i>MERTK</i>     | 6.53403  | 0.452719 | -3.85128 | 2.70687 | 0.006792 | 0.283016 |
| <i>LOC200772</i> | 2.02111  | 0.141705 | -3.83419 | 2.37091 | 0.017744 | 1        |
| <i>CLCN4</i>     | 0.784523 | 0.055147 | -3.83046 | 2.07147 | 0.038314 | 1        |
| <i>FKBP8</i>     | 593.936  | 42.2     | -3.81499 | 3.08069 | 0.002065 | 0.134127 |
| <i>PDZKIIP1</i>  | 20.7328  | 1.49133  | -3.79724 | 3.18402 | 0.001452 | 0.10284  |
| <i>TRIM68</i>    | 1.35348  | 0.097551 | -3.79437 | 2.0373  | 0.04162  | 1        |
| <i>RBPM52</i>    | 2.20271  | 0.161705 | -3.76784 | 2.33179 | 0.019712 | 1        |
| <i>ARHGEF10</i>  | 0.755194 | 0.055676 | -3.76172 | 2.01155 | 0.044268 | 1        |
| <i>TUBB4A</i>    | 0.747791 | 0.05557  | -3.75027 | 1.97638 | 0.048112 | 1        |
| <i>TDRD9</i>     | 5.20902  | 0.395424 | -3.71954 | 2.39885 | 0.016447 | 0.451546 |
| <i>JAM3</i>      | 7.42999  | 0.579157 | -3.68133 | 2.66831 | 0.007623 | 0.304189 |
| <i>TMEM40</i>    | 13.2846  | 1.04614  | -3.66662 | 2.82527 | 0.004724 | 0.22582  |
| <i>SIGLEC11</i>  | 1.72885  | 0.136407 | -3.66383 | 2.05069 | 0.040297 | 1        |
| <i>IGF2BP2</i>   | 14.6625  | 1.1593   | -3.66081 | 3.22766 | 0.001248 | 0.094555 |
| <i>PRKAR1B</i>   | 10.2227  | 0.816563 | -3.64606 | 2.41806 | 0.015603 | 0.441254 |
| <i>CTN</i>       | 7.21619  | 0.579179 | -3.63916 | 2.41403 | 0.015777 | 0.443769 |
| <i>C1orf198</i>  | 3.6482   | 0.297093 | -3.6182  | 2.60242 | 0.009257 | 0.3261   |
| <i>PRUNE</i>     | 11.2082  | 0.923013 | -3.60206 | 3.15945 | 0.001581 | 0.109337 |
| <i>VWF</i>       | 2.39827  | 0.198404 | -3.59548 | 3.11777 | 0.001822 | 1        |
| <i>ADIPOR1</i>   | 372.938  | 30.9164  | -3.59249 | 1.99117 | 0.046462 | 0.696711 |
| <i>KNDC1</i>     | 0.88082  | 0.07302  | -3.59248 | 2.48642 | 0.012903 | 1        |
| <i>CLDN5</i>     | 11.3553  | 0.945606 | -3.58598 | 2.66082 | 0.007795 | 0.305863 |

|                  |         |          |          |         |          |          |
|------------------|---------|----------|----------|---------|----------|----------|
| <i>PCYT1B</i>    | 1.32914 | 0.11185  | -3.57086 | 2.00762 | 0.044684 | 1        |
| <i>KREMEN1</i>   | 5.28361 | 0.451402 | -3.54904 | 3.2855  | 0.001018 | 0.082645 |
| <i>CCRL2</i>     | 4.81145 | 0.41212  | -3.54534 | 2.1923  | 0.028358 | 0.581742 |
| <i>NEDD4L</i>    | 2.20812 | 0.193935 | -3.50917 | 2.33021 | 0.019795 | 1        |
| <i>VIL1</i>      | 2.48077 | 0.218812 | -3.50303 | 2.18073 | 0.029204 | 1        |
| <i>CCR2</i>      | 50.9301 | 4.55713  | -3.48232 | 3.06697 | 0.002162 | 0.136977 |
| <i>RAB6B</i>     | 2.85407 | 0.259698 | -3.45811 | 2.77523 | 0.005516 | 1        |
| <i>KLHDC8B</i>   | 6.12016 | 0.567093 | -3.43191 | 2.56653 | 0.010272 | 0.345478 |
| <i>TSPAN5</i>    | 14.9066 | 1.39832  | -3.41418 | 2.99633 | 0.002732 | 0.15894  |
| <i>HSPA7</i>     | 17.4679 | 1.64287  | -3.41042 | 3.47415 | 0.000512 | 0.05134  |
| <i>PBX1</i>      | 2.01858 | 0.191779 | -3.39583 | 2.14925 | 0.031614 | 1        |
| <i>ZBTB45</i>    | 5.52856 | 0.528357 | -3.38732 | 2.88935 | 0.00386  | 0.203093 |
| <i>FASLG</i>     | 2.94901 | 0.285468 | -3.36883 | 2.09056 | 0.036568 | 1        |
| <i>SIGLEC16</i>  | 3.01759 | 0.292771 | -3.36555 | 2.08519 | 0.037052 | 0.658339 |
| <i>PTGS1</i>     | 68.9    | 6.72551  | -3.35679 | 3.29581 | 0.000981 | 0.081039 |
| <i>TMTC1</i>     | 1.44    | 0.14196  | -3.34251 | 2.22972 | 0.025766 | 1        |
| <i>FAH</i>       | 6.93719 | 0.684441 | -3.34135 | 2.40066 | 0.016366 | 0.451546 |
| <i>LOC113230</i> | 5.01583 | 0.498771 | -3.33004 | 2.0594  | 0.039456 | 0.674325 |
| <i>KCNJ2</i>     | 4.29494 | 0.4283   | -3.32594 | 2.66621 | 0.007671 | 0.30434  |
| <i>TUBB1</i>     | 130.381 | 13.0102  | -3.32502 | 3.36163 | 0.000775 | 0.070161 |
| <i>LMNA</i>      | 12.8974 | 1.29462  | -3.31648 | 2.76503 | 0.005692 | 0.249948 |
| <i>MFAP3L</i>    | 4.35761 | 0.43835  | -3.31338 | 2.56653 | 0.010272 | 0.345478 |
| <i>GIPC3</i>     | 1.32047 | 0.133083 | -3.31066 | 2.62684 | 0.008618 | 1        |
| <i>MXII</i>      | 62.6068 | 6.32651  | -3.30684 | 3.32522 | 0.000883 | 0.075634 |
| <i>UBB</i>       | 1699.42 | 173.695  | -3.29042 | 2.45559 | 0.014065 | 0.417831 |
| <i>HIST1H2AC</i> | 104.503 | 10.733   | -3.28342 | 2.67959 | 0.007371 | 0.299205 |
| <i>C7orf41</i>   | 24.2498 | 2.5209   | -3.26596 | 3.10643 | 0.001894 | 0.126346 |
| <i>KIFC3</i>     | 3.47317 | 0.364785 | -3.25114 | 2.2289  | 0.02582  | 0.562846 |

|                     |         |          |          |         |          |          |
|---------------------|---------|----------|----------|---------|----------|----------|
| <i>LAPTM4B</i>      | 4.39858 | 0.464675 | -3.24274 | 2.25903 | 0.023881 | 0.543477 |
| <i>SLC38A5</i>      | 22.7732 | 2.41279  | -3.23856 | 3.08627 | 0.002027 | 0.132545 |
| <i>TIMP1</i>        | 285.856 | 30.4835  | -3.22919 | 2.53484 | 0.01125  | 0.365307 |
| <i>FZD5</i>         | 1.42718 | 0.152604 | -3.2253  | 2.23625 | 0.025335 | 1        |
| <i>NPRL3</i>        | 67.6823 | 7.28975  | -3.21484 | 3.20055 | 0.001372 | 0.100131 |
| <i>MICAL2</i>       | 66.6708 | 7.19529  | -3.21193 | 2.33101 | 0.019753 | 0.496251 |
| <i>ACOT7</i>        | 9.82992 | 1.06374  | -3.20803 | 2.43188 | 0.015021 | 0.433316 |
| <i>LOC100134229</i> | 5.33969 | 0.582693 | -3.19595 | 2.40634 | 0.016113 | 0.448927 |
| <i>FCGR1B</i>       | 9.939   | 1.0848   | -3.19568 | 2.33482 | 0.019553 | 0.496251 |
| <i>PDCD1</i>        | 2.88041 | 0.314708 | -3.19419 | 2.35189 | 0.018678 | 1        |
| <i>KCNH2</i>        | 2.26655 | 0.247895 | -3.1927  | 2.13032 | 0.033145 | 1        |
| <i>PARVB</i>        | 22.1433 | 2.42645  | -3.18995 | 3.21182 | 0.001319 | 0.097581 |
| <i>HIST1H1C</i>     | 66.1651 | 7.32213  | -3.17574 | 2.98776 | 0.00281  | 0.160391 |
| <i>CLU</i>          | 140.41  | 15.7443  | -3.15674 | 2.97959 | 0.002886 | 0.163737 |
| <i>KCNJ15</i>       | 7.70479 | 0.865856 | -3.15356 | 2.60154 | 0.009281 | 0.3261   |
| <i>ALPL</i>         | 10.5511 | 1.18605  | -3.15316 | 3.18772 | 0.001434 | 0.10284  |
| <i>E2F1</i>         | 11.4361 | 1.29551  | -3.142   | 3.38714 | 0.000706 | 0.065205 |
| <i>TTC7B</i>        | 6.60913 | 0.751975 | -3.1357  | 3.01562 | 0.002565 | 0.156819 |
| <i>NFE2</i>         | 83.0598 | 9.48741  | -3.13007 | 3.22605 | 0.001255 | 0.094555 |
| <i>TFR2</i>         | 3.11146 | 0.355965 | -3.12778 | 2.28247 | 0.022461 | 0.5237   |
| <i>SIRPB2</i>       | 18.1195 | 2.08006  | -3.12285 | 3.35692 | 0.000788 | 0.070499 |
| <i>FPR2</i>         | 54.4143 | 6.28253  | -3.11457 | 3.46041 | 0.000539 | 0.053463 |
| <i>ALOX12</i>       | 11.7244 | 1.38721  | -3.07926 | 2.49048 | 0.012757 | 0.393884 |
| <i>NGFRAP1</i>      | 31.1091 | 3.72556  | -3.06181 | 2.31298 | 0.020724 | 0.506893 |
| <i>RNF10</i>        | 196.091 | 23.7024  | -3.04841 | 2.98946 | 0.002795 | 0.160391 |
| <i>BSG</i>          | 435.216 | 52.9672  | -3.03856 | 2.45165 | 0.01422  | 0.419787 |
| <i>SDC3</i>         | 1.30511 | 0.158842 | -3.03851 | 2.35864 | 0.018342 | 1        |
| <i>TSPAN9</i>       | 3.04848 | 0.371121 | -3.03813 | 2.58931 | 0.009617 | 0.333453 |



|                  |         |          |          |         |          |          |
|------------------|---------|----------|----------|---------|----------|----------|
| <i>CD300LB</i>   | 18.998  | 2.31811  | -3.03483 | 3.39705 | 0.000681 | 0.063511 |
| <i>GP1BA</i>     | 9.06586 | 1.1092   | -3.03093 | 3.40917 | 0.000652 | 0.061363 |
| <i>HMBS</i>      | 13.1355 | 1.62726  | -3.01296 | 2.42619 | 0.015258 | 0.43674  |
| <i>RHOBTB1</i>   | 2.27331 | 0.282251 | -3.00975 | 1.97793 | 0.047937 | 1        |
| <i>GUK1</i>      | 246.729 | 30.6751  | -3.00779 | 2.30116 | 0.021383 | 0.508601 |
| <i>ASCC2</i>     | 64.2588 | 7.99462  | -3.00679 | 2.88003 | 0.003976 | 0.206883 |
| <i>MGC16275</i>  | 2.10586 | 0.263485 | -2.99862 | 2.18829 | 0.028649 | 1        |
| <i>ZBTB32</i>    | 2.07462 | 0.261289 | -2.98913 | 2.03448 | 0.041903 | 1        |
| <i>LILRB1</i>    | 68.4709 | 8.62673  | -2.9886  | 2.52656 | 0.011519 | 0.366251 |
| <i>SNAPIN</i>    | 17.231  | 2.17734  | -2.98437 | 2.4688  | 0.013557 | 0.410905 |
| <i>FHL1</i>      | 21.0077 | 2.65517  | -2.98404 | 3.01254 | 0.002591 | 0.157187 |
| <i>HAGH</i>      | 63.0641 | 8.15181  | -2.95163 | 2.99614 | 0.002734 | 0.15894  |
| <i>CX3CR1</i>    | 112.75  | 14.7154  | -2.93772 | 2.89334 | 0.003812 | 0.202793 |
| <i>PLEKHF1</i>   | 10.0114 | 1.30671  | -2.93764 | 2.6036  | 0.009225 | 0.3261   |
| <i>DAPK3</i>     | 22.4019 | 2.93167  | -2.93383 | 2.60259 | 0.009252 | 0.3261   |
| <i>MARCO</i>     | 10.2688 | 1.35174  | -2.92537 | 2.08946 | 0.036667 | 0.656445 |
| <i>HIST2H2BE</i> | 37.0848 | 4.91015  | -2.91699 | 3.48614 | 0.00049  | 0.051092 |
| <i>RILP</i>      | 14.5057 | 1.93465  | -2.90647 | 2.37255 | 0.017666 | 0.472614 |
| <i>LRRC32</i>    | 12.8436 | 1.71972  | -2.9008  | 2.62813 | 0.008586 | 0.321182 |
| <i>MMP17</i>     | 2.92854 | 0.41038  | -2.83515 | 2.03718 | 0.041632 | 1        |
| <i>CLIC3</i>     | 25.1947 | 3.55749  | -2.82419 | 2.5844  | 0.009755 | 0.335628 |
| <i>UBE2O</i>     | 26.0687 | 3.69561  | -2.81844 | 3.43917 | 0.000583 | 0.056261 |
| <i>VENTX</i>     | 9.55436 | 1.37073  | -2.80121 | 2.80081 | 0.005097 | 0.233045 |
| <i>GABARAPL2</i> | 63.3092 | 9.09105  | -2.7999  | 2.85209 | 0.004343 | 0.215265 |
| <i>F13A1</i>     | 129.745 | 18.7409  | -2.79142 | 2.99173 | 0.002774 | 0.160261 |
| <i>SHROOM1</i>   | 4.44539 | 0.652903 | -2.76737 | 2.37744 | 0.017433 | 0.468702 |
| <i>EPOR</i>      | 4.53563 | 0.666957 | -2.76564 | 2.30471 | 0.021183 | 0.508601 |
| <i>RBM38</i>     | 259.06  | 38.6602  | -2.74437 | 2.31779 | 0.020461 | 0.504389 |

|                   |         |          |          |         |          |          |
|-------------------|---------|----------|----------|---------|----------|----------|
| <i>ST6GALNAC4</i> | 26.1905 | 3.92896  | -2.73682 | 2.33374 | 0.01961  | 0.496251 |
| <i>EGR1</i>       | 37.0981 | 5.5753   | -2.73423 | 3.49195 | 0.00048  | 0.051092 |
| <i>FAM118A</i>    | 16.1837 | 2.45336  | -2.72171 | 2.8005  | 0.005102 | 0.233045 |
| <i>LHPP</i>       | 7.33353 | 1.1123   | -2.72096 | 2.63998 | 0.008291 | 0.314922 |
| <i>MPP1</i>       | 217.232 | 32.968   | -2.7201  | 2.29989 | 0.021455 | 0.508914 |
| <i>AQP9</i>       | 47.8225 | 7.26199  | -2.71925 | 3.47832 | 0.000505 | 0.051092 |
| <i>PTGS2</i>      | 6.4605  | 0.986647 | -2.71104 | 2.49396 | 0.012633 | 0.392042 |
| <i>RNF11</i>      | 55.8247 | 8.56261  | -2.70478 | 3.48011 | 0.000501 | 0.051092 |
| <i>CD151</i>      | 46.1389 | 7.12273  | -2.69548 | 3.00191 | 0.002683 | 0.15894  |
| <i>GIMAP8</i>     | 17.8197 | 2.75125  | -2.69532 | 3.15762 | 0.001591 | 0.109337 |
| <i>CLIC2</i>      | 4.71733 | 0.742778 | -2.66697 | 1.98357 | 0.047303 | 0.699014 |
| <i>ARHGEF12</i>   | 14.8449 | 2.36666  | -2.64904 | 3.03371 | 0.002416 | 0.148681 |
| <i>TSPAN17</i>    | 13.6964 | 2.1867   | -2.64697 | 2.39903 | 0.016438 | 0.451546 |
| <i>LTBP1</i>      | 6.46713 | 1.0408   | -2.63543 | 2.09718 | 0.035978 | 0.651544 |
| <i>CA2</i>        | 31.4906 | 5.14611  | -2.61337 | 2.88127 | 0.003961 | 0.206883 |
| <i>SH3BGRL2</i>   | 7.4173  | 1.2162   | -2.60851 | 2.51483 | 0.011909 | 0.373552 |
| <i>HK1</i>        | 122.149 | 20.2683  | -2.59135 | 2.73236 | 0.006288 | 0.269166 |
| <i>CXCR2P1</i>    | 30.3991 | 5.05717  | -2.58763 | 2.41381 | 0.015787 | 0.443769 |
| <i>PCTP</i>       | 26.7611 | 4.45249  | -2.58745 | 2.95868 | 0.00309  | 0.172161 |
| <i>MAP3K6</i>     | 4.63659 | 0.774818 | -2.58113 | 2.62776 | 0.008595 | 0.321182 |
| <i>C2orf88</i>    | 10.5725 | 1.77961  | -2.57069 | 2.33625 | 0.019478 | 0.496251 |
| <i>ZNF438</i>     | 6.61631 | 1.11647  | -2.56709 | 2.36424 | 0.018067 | 0.479305 |
| <i>FOS</i>        | 240.642 | 40.7085  | -2.56349 | 2.06524 | 0.0389   | 0.672618 |
| <i>SIAH2</i>      | 71.4118 | 12.1134  | -2.55956 | 3.33481 | 0.000854 | 0.074426 |
| <i>FAM46C</i>     | 51.379  | 8.8219   | -2.54202 | 3.16194 | 0.001567 | 0.109322 |
| <i>UBL4A</i>      | 15.0257 | 2.5843   | -2.53959 | 2.92006 | 0.0035   | 0.190497 |
| <i>ZER1</i>       | 40.4999 | 7.09657  | -2.51273 | 2.903   | 0.003696 | 0.197761 |
| <i>TNFRSF1A</i>   | 75.3781 | 13.214   | -2.51208 | 3.255   | 0.001134 | 0.089733 |

|                 |         |          |          |         |          |          |
|-----------------|---------|----------|----------|---------|----------|----------|
| <i>TECPRI</i>   | 13.4143 | 2.35527  | -2.5098  | 2.30315 | 0.02127  | 0.508601 |
| <i>CXCR2</i>    | 25.0925 | 4.41352  | -2.50725 | 2.9624  | 0.003053 | 0.171105 |
| <i>FLJ45445</i> | 12.0696 | 2.14295  | -2.4937  | 3.25207 | 0.001146 | 0.089907 |
| <i>GUCY1B3</i>  | 4.6639  | 0.830782 | -2.48899 | 2.04192 | 0.041159 | 0.688301 |
| <i>CYP1B1</i>   | 45.5157 | 8.14154  | -2.48299 | 3.18426 | 0.001451 | 0.10284  |
| <i>FZD2</i>     | 4.27391 | 0.770968 | -2.47082 | 2.26387 | 0.023582 | 0.542963 |
| <i>TMEM63B</i>  | 19.9495 | 3.60275  | -2.46919 | 2.07535 | 0.037954 | 0.66806  |
| <i>GPXI</i>     | 1005.82 | 182.591  | -2.46169 | 2.25185 | 0.024332 | 0.546857 |
| <i>NCKIPSD</i>  | 5.13969 | 0.933099 | -2.46158 | 2.4317  | 0.015028 | 0.433316 |
| <i>LILRA1</i>   | 52.2572 | 9.49775  | -2.45997 | 2.38437 | 0.017108 | 0.46427  |
| <i>EMR1</i>     | 26.7106 | 4.91023  | -2.44355 | 2.75796 | 0.005816 | 0.252405 |
| <i>NAPSB</i>    | 57.9163 | 10.6591  | -2.44188 | 2.61939 | 0.008809 | 0.322313 |
| <i>PDLIM1</i>   | 46.6652 | 8.60889  | -2.43845 | 2.83293 | 0.004612 | 0.225049 |
| <i>SDPR</i>     | 37.7954 | 7.02783  | -2.42706 | 3.16678 | 0.001541 | 0.10832  |
| <i>RHOC</i>     | 37.5578 | 6.9937   | -2.42498 | 2.77772 | 0.005474 | 0.243163 |
| <i>R3HDM4</i>   | 208.764 | 38.9574  | -2.42191 | 2.75826 | 0.005811 | 0.252405 |
| <i>FPRI</i>     | 309.308 | 57.8636  | -2.41832 | 2.61852 | 0.008831 | 0.322313 |
| <i>FOXO3</i>    | 37.5545 | 7.07088  | -2.40902 | 2.79443 | 0.005199 | 0.234431 |
| <i>CLIP2</i>    | 8.26399 | 1.56116  | -2.40422 | 2.54793 | 0.010836 | 0.355558 |
| <i>RNF123</i>   | 27.0343 | 5.10868  | -2.40377 | 2.43328 | 0.014963 | 0.433316 |
| <i>PHF23</i>    | 9.34965 | 1.77624  | -2.39608 | 2.62001 | 0.008793 | 0.322313 |
| <i>ACCS</i>     | 23.6394 | 4.50482  | -2.39165 | 2.22438 | 0.026123 | 0.563025 |
| <i>CD300C</i>   | 26.3656 | 5.083    | -2.3749  | 2.59286 | 0.009518 | 0.331972 |
| <i>GSPT1</i>    | 61.1511 | 11.8155  | -2.3717  | 2.67253 | 0.007528 | 0.302964 |
| <i>LYL1</i>     | 44.8708 | 8.72001  | -2.36338 | 2.81549 | 0.00487  | 0.228403 |
| <i>PPME1</i>    | 9.24022 | 1.81801  | -2.34556 | 2.4341  | 0.014929 | 0.433316 |
| <i>DAP</i>      | 77.0794 | 15.1808  | -2.3441  | 3.00676 | 0.002641 | 0.15838  |
| <i>DPM2</i>     | 27.5576 | 5.438    | -2.3413  | 2.35487 | 0.018529 | 0.484691 |

|                   |         |          |          |         |          |          |
|-------------------|---------|----------|----------|---------|----------|----------|
| <i>AKI</i>        | 4.73369 | 0.945002 | -2.32457 | 2.05267 | 0.040104 | 0.678031 |
| <i>MCOLN1</i>     | 30.6686 | 6.14026  | -2.32039 | 2.48558 | 0.012934 | 0.398034 |
| <i>AGPAT1</i>     | 43.2969 | 8.67978  | -2.31853 | 2.52847 | 0.011456 | 0.365934 |
| <i>AP2A1</i>      | 87.1343 | 17.4817  | -2.3174  | 2.67396 | 0.007496 | 0.302964 |
| <i>TESC</i>       | 47.4137 | 9.51508  | -2.31702 | 2.54924 | 0.010796 | 0.35547  |
| <i>C17orf59</i>   | 9.37395 | 1.88274  | -2.31583 | 2.36421 | 0.018069 | 0.479305 |
| <i>RANBP10</i>    | 19.3023 | 3.88911  | -2.31126 | 1.98728 | 0.046891 | 0.697344 |
| <i>SIGLEC9</i>    | 38.0556 | 7.68645  | -2.30772 | 2.30107 | 0.021388 | 0.508601 |
| <i>ENDOD1</i>     | 10.6762 | 2.17888  | -2.29275 | 2.60194 | 0.00927  | 0.3261   |
| <i>HIST1H2BK</i>  | 84.1255 | 17.2501  | -2.28594 | 2.82716 | 0.004696 | 0.22582  |
| <i>TLR8</i>       | 39.7996 | 8.17261  | -2.28388 | 2.42762 | 0.015199 | 0.436353 |
| <i>C9orf78</i>    | 93.1377 | 19.1713  | -2.28042 | 2.97479 | 0.002932 | 0.165329 |
| <i>EFNB1</i>      | 2.30217 | 0.475897 | -2.27427 | 1.98877 | 0.046727 | 1        |
| <i>CXCRI</i>      | 22.474  | 4.67685  | -2.26465 | 2.84299 | 0.004469 | 0.219201 |
| <i>MICALCL</i>    | 4.81562 | 1.00372  | -2.26236 | 2.34465 | 0.019045 | 0.491359 |
| <i>CARD9</i>      | 16.506  | 3.44084  | -2.26216 | 2.3112  | 0.020822 | 0.507971 |
| <i>GRAP2</i>      | 57.615  | 12.0609  | -2.25611 | 2.17705 | 0.029477 | 0.58562  |
| <i>C9orf167</i>   | 11.8383 | 2.48491  | -2.2522  | 2.93188 | 0.003369 | 0.184464 |
| <i>APOL2</i>      | 10.5024 | 2.20971  | -2.24879 | 2.14023 | 0.032336 | 0.615165 |
| <i>MRVII</i>      | 3.68441 | 0.779454 | -2.2409  | 2.16063 | 0.030724 | 0.596546 |
| <i>HIST2H2AA3</i> | 43.3467 | 9.19277  | -2.23735 | 2.05654 | 0.039731 | 0.676569 |
| <i>PPP2R5B</i>    | 10.336  | 2.20554  | -2.22847 | 2.69083 | 0.007128 | 0.294385 |
| <i>ABCC3</i>      | 13.2464 | 2.85366  | -2.21472 | 2.05447 | 0.03993  | 0.678031 |
| <i>TMEM150B</i>   | 18.1    | 3.91197  | -2.21002 | 2.00764 | 0.044681 | 0.695142 |
| <i>HAUS4</i>      | 15.7832 | 3.43583  | -2.19966 | 1.97109 | 0.048714 | 0.702983 |
| <i>ZNF185</i>     | 30.7856 | 6.71956  | -2.19582 | 2.15163 | 0.031427 | 0.603972 |
| <i>SECTMI</i>     | 56.2641 | 12.3524  | -2.18742 | 2.86912 | 0.004116 | 0.211163 |
| <i>HIST2H2AA3</i> | 41.2949 | 9.19277  | -2.16739 | 1.9847  | 0.047178 | 0.699014 |

|                 |         |          |          |         |          |          |
|-----------------|---------|----------|----------|---------|----------|----------|
| <i>SH3TC1</i>   | 16.869  | 3.75781  | -2.16641 | 2.66531 | 0.007692 | 0.30434  |
| <i>FOXO4</i>    | 25.0818 | 5.60635  | -2.16151 | 2.86819 | 0.004128 | 0.211163 |
| <i>CDC42EP2</i> | 7.96072 | 1.78588  | -2.15626 | 2.36095 | 0.018228 | 0.480832 |
| <i>EIF2AK1</i>  | 51.6413 | 11.6807  | -2.1444  | 2.36829 | 0.017871 | 0.476737 |
| <i>ABCC4</i>    | 4.34017 | 0.983965 | -2.14107 | 1.9982  | 0.045695 | 0.695142 |
| <i>ABI3</i>     | 30.1676 | 6.84153  | -2.14061 | 2.65741 | 0.007874 | 0.307684 |
| <i>CNPPD1</i>   | 39.3342 | 8.99576  | -2.12847 | 2.85475 | 0.004307 | 0.214603 |
| <i>HSPB1</i>    | 59.2228 | 13.5585  | -2.12695 | 2.18869 | 0.028619 | 0.582085 |
| <i>FAM157B</i>  | 14.5563 | 3.34505  | -2.12154 | 2.09445 | 0.03622  | 0.653411 |
| <i>PQLC1</i>    | 40.4357 | 9.35713  | -2.11149 | 2.21438 | 0.026803 | 0.573492 |
| <i>ANKRD50</i>  | 3.42128 | 0.79855  | -2.09908 | 2.01996 | 0.043388 | 0.694591 |
| <i>LILRB4</i>   | 22.9619 | 5.3672   | -2.097   | 2.20641 | 0.027355 | 0.576228 |
| <i>MBNL3</i>    | 27.6851 | 6.5099   | -2.0884  | 2.09777 | 0.035926 | 0.651544 |
| <i>FZD1</i>     | 3.65821 | 0.862116 | -2.08518 | 1.97666 | 0.04808  | 0.702983 |
| <i>CDC42BPB</i> | 5.74939 | 1.3575   | -2.08245 | 2.25951 | 0.023852 | 0.543477 |
| <i>SBNO2</i>    | 39.7646 | 9.39828  | -2.08102 | 2.04264 | 0.041088 | 0.688301 |
| <i>C19orf35</i> | 7.17897 | 1.7045   | -2.07443 | 2.24503 | 0.024766 | 0.550059 |
| <i>KCTD21</i>   | 3.42493 | 0.814524 | -2.07205 | 1.96942 | 0.048905 | 0.702983 |
| <i>TFDP1</i>    | 69.4214 | 16.583   | -2.06568 | 2.24526 | 0.024752 | 0.550059 |
| <i>OST4</i>     | 544.575 | 130.152  | -2.06493 | 2.49331 | 0.012656 | 0.392043 |
| <i>C9orf69</i>  | 19.5834 | 4.69172  | -2.06144 | 2.45907 | 0.01393  | 0.417757 |
| <i>PIK3R6</i>   | 4.59819 | 1.11177  | -2.04821 | 2.17718 | 0.029467 | 0.58562  |
| <i>TSC22D1</i>  | 13.605  | 3.29092  | -2.04758 | 2.01476 | 0.043929 | 0.695142 |
| <i>LILRP2</i>   | 7.07871 | 1.72221  | -2.03922 | 2.17771 | 0.029428 | 0.58562  |
| <i>BNIP3L</i>   | 114.172 | 27.7858  | -2.03879 | 2.22638 | 0.025989 | 0.563025 |
| <i>TSPAN33</i>  | 12.8738 | 3.13968  | -2.03575 | 2.55479 | 0.010625 | 0.35343  |
| <i>SLC25A29</i> | 6.89536 | 1.69192  | -2.02696 | 2.04856 | 0.040505 | 0.68236  |
| <i>HMOX1</i>    | 62.2434 | 15.3039  | -2.02402 | 2.72783 | 0.006375 | 0.270433 |

|                    |          |          |          |          |          |          |
|--------------------|----------|----------|----------|----------|----------|----------|
| <i>TMEM111</i>     | 47.9273  | 11.8056  | -2.02138 | 2.46728  | 0.013614 | 0.410917 |
| <i>ATG9A</i>       | 25.5498  | 6.31211  | -2.01712 | 2.34264  | 0.019148 | 0.492669 |
| <i>FAM212B</i>     | 3.86972  | 0.957778 | -2.01446 | 2.02118  | 0.043261 | 0.694018 |
| <i>MAP2K3</i>      | 75.8383  | 18.8321  | -2.00973 | 2.06933  | 0.038515 | 0.671257 |
| <i>PNP</i>         | 34.4257  | 8.58673  | -2.0033  | 2.62276  | 0.008722 | 0.322313 |
| <i>AZU1</i>        | 26.8112  | 107.752  | 2.0068   | -2.61591 | 0.008899 | 0.322313 |
| <i>SAMD8</i>       | 2.06629  | 8.37868  | 2.01968  | -2.34899 | 0.018825 | 0.48754  |
| <i>TMEM194A</i>    | 1.39081  | 5.68893  | 2.03223  | -2.20384 | 0.027536 | 0.576228 |
| <i>ZDHHC17</i>     | 3.46908  | 14.3834  | 2.05178  | -2.10638 | 0.035172 | 0.641907 |
| <i>PIK3R1</i>      | 8.79263  | 37.5842  | 2.09576  | -2.08379 | 0.037179 | 0.659355 |
| <i>CAMP</i>        | 53.5725  | 231.433  | 2.11103  | -2.79309 | 0.005221 | 0.234431 |
| <i>DUSP2</i>       | 3.46997  | 15.1513  | 2.12644  | -2.26141 | 0.023734 | 0.543477 |
| <i>CHIC1</i>       | 0.700715 | 3.06875  | 2.13075  | -2.02237 | 0.043138 | 0.693548 |
| <i>SLC2A5</i>      | 2.35558  | 10.358   | 2.13658  | -2.06228 | 0.039181 | 0.672618 |
| <i>BIRC3</i>       | 3.76364  | 16.5572  | 2.13726  | -2.3497  | 0.018788 | 0.48754  |
| <i>PRTN3</i>       | 17.6392  | 77.6243  | 2.13772  | -2.80066 | 0.0051   | 0.233045 |
| <i>KLHL15</i>      | 1.10623  | 4.91539  | 2.15165  | -2.18978 | 0.02854  | 0.581742 |
| <i>SASH1</i>       | 0.654022 | 2.92766  | 2.16234  | -2.27658 | 0.022811 | 1        |
| <i>ENPP4</i>       | 1.50212  | 6.79772  | 2.17805  | -2.25615 | 0.024061 | 0.543477 |
| <i>SLC25A36</i>    | 4.07175  | 18.6234  | 2.19339  | -2.56883 | 0.010204 | 0.345478 |
| <i>HERC5</i>       | 1.67792  | 7.70209  | 2.19858  | -2.22431 | 0.026127 | 0.563025 |
| <i>IFIT5</i>       | 1.24185  | 5.73944  | 2.20842  | -2.16167 | 0.030644 | 0.596224 |
| <i>THEM4</i>       | 0.638748 | 2.9673   | 2.21583  | -2.17383 | 0.029718 | 0.587929 |
| <i>PGLYRP1</i>     | 25.0964  | 118.543  | 2.23986  | -2.95149 | 0.003162 | 0.175182 |
| <i>FUT4,PIWIL4</i> | 5.00749  | 23.6881  | 2.24201  | -2.2492  | 0.0245   | 0.548017 |
| <i>ZXDB</i>        | 0.78189  | 3.76682  | 2.26831  | -2.29154 | 0.021933 | 0.516345 |
| <i>DEFA1</i>       | 400.755  | 1937.35  | 2.27329  | -2.20652 | 0.027348 | 0.576228 |
| <i>NIT2</i>        | 3.18477  | 15.5977  | 2.29207  | -2.13684 | 0.032611 | 0.619149 |

|                  |          |          |         |          |          |          |
|------------------|----------|----------|---------|----------|----------|----------|
| <b>RORA</b>      | 2.95807  | 14.549   | 2.29819 | -2.89132 | 0.003836 | 0.202956 |
| <b>PAX5</b>      | 0.971882 | 4.82712  | 2.31231 | -2.45389 | 0.014132 | 0.418492 |
| <b>LEF1</b>      | 5.22977  | 26.0292  | 2.31531 | -2.58185 | 0.009827 | 0.335628 |
| <b>EIF2AK2</b>   | 5.39059  | 27.6998  | 2.36136 | -2.52212 | 0.011665 | 0.368621 |
| <b>OLR1</b>      | 2.98562  | 15.3642  | 2.36346 | -2.52886 | 0.011443 | 0.365934 |
| <b>ITGA6</b>     | 1.62336  | 8.36782  | 2.36587 | -2.43685 | 0.014816 | 0.433293 |
| <b>ODZ1</b>      | 0.395695 | 2.04097  | 2.3668  | -2.22413 | 0.02614  | 1        |
| <b>ANKRD36B</b>  | 1.12088  | 5.89827  | 2.39566 | -2.30235 | 0.021315 | 0.508601 |
| <b>ATP8B4</b>    | 2.05358  | 10.8369  | 2.39974 | -2.16735 | 0.030208 | 0.596224 |
| <b>LCN2</b>      | 205.984  | 1088.59  | 2.40186 | -2.34858 | 0.018845 | 0.48754  |
| <b>MPO</b>       | 21.0883  | 111.92   | 2.40795 | -2.64233 | 0.008234 | 0.314922 |
| <b>RGPD8</b>     | 0.540697 | 3.00148  | 2.47278 | -2.1495  | 0.031594 | 0.604725 |
| <b>SIK1</b>      | 1.27585  | 7.24648  | 2.50582 | -2.62509 | 0.008663 | 0.322313 |
| <b>CEACAM1</b>   | 5.07847  | 28.9951  | 2.51334 | -2.93343 | 0.003352 | 0.184464 |
| <b>CCDC126</b>   | 0.963742 | 5.59134  | 2.53647 | -1.96027 | 0.049964 | 0.705419 |
| <b>PLEKHA1</b>   | 1.42216  | 8.55011  | 2.58786 | -2.58387 | 0.00977  | 0.335628 |
| <b>DEFA1B</b>    | 292.834  | 1760.85  | 2.58812 | -2.86156 | 0.004216 | 0.211163 |
| <b>DEFA1</b>     | 293.883  | 1773.24  | 2.59308 | -2.86244 | 0.004204 | 0.211163 |
| <b>SLC28A3</b>   | 0.644345 | 3.91523  | 2.60319 | -2.08217 | 0.037327 | 0.659909 |
| <b>CEACAM8</b>   | 22.2508  | 137.439  | 2.62686 | -3.10841 | 0.001881 | 0.126346 |
| <b>IFIT1</b>     | 1.41864  | 8.7855   | 2.63061 | -2.24343 | 0.024869 | 0.551044 |
| <b>TSHZ2</b>     | 0.134186 | 0.845072 | 2.65484 | -1.99151 | 0.046425 | 1        |
| <b>TCN1</b>      | 10.5526  | 66.8514  | 2.66335 | -3.40984 | 0.00065  | 0.061363 |
| <b>HJURP</b>     | 0.475868 | 3.05941  | 2.68462 | -2.05304 | 0.040069 | 0.678031 |
| <b>SERPINB10</b> | 4.20704  | 27.2469  | 2.69521 | -3.19052 | 0.00142  | 0.10284  |
| <b>DPP4</b>      | 0.480314 | 3.1351   | 2.70646 | -2.16196 | 0.030622 | 0.596224 |
| <b>IFI6</b>      | 24.624   | 164.298  | 2.73817 | -3.13292 | 0.001731 | 0.117257 |
| <b>L2HGDH</b>    | 0.242979 | 1.654    | 2.76705 | -2.00076 | 0.045418 | 1        |

|                  |          |          |         |          |          |          |
|------------------|----------|----------|---------|----------|----------|----------|
| <i>ZNF254</i>    | 0.569701 | 3.88571  | 2.7699  | -2.26917 | 0.023258 | 0.53813  |
| <i>CLC</i>       | 6.38987  | 43.5967  | 2.77036 | -2.55472 | 0.010627 | 0.35343  |
| <i>MS4A3</i>     | 5.70754  | 39.8575  | 2.80391 | -2.66955 | 0.007595 | 0.304189 |
| <i>ANXA3</i>     | 5.10822  | 36.5986  | 2.84089 | -3.24054 | 0.001193 | 0.091339 |
| <i>ERAP2</i>     | 2.56604  | 18.4228  | 2.84388 | -3.33737 | 0.000846 | 0.074426 |
| <i>C2orf89</i>   | 2.43781  | 17.7356  | 2.86299 | -2.22566 | 0.026037 | 0.563025 |
| <i>ZDBF2</i>     | 0.172714 | 1.2654   | 2.87314 | -2.17087 | 0.029941 | 1        |
| <i>PASK</i>      | 1.65675  | 12.1615  | 2.8759  | -2.5979  | 0.00938  | 0.328356 |
| <i>USP45</i>     | 0.22189  | 1.70934  | 2.94553 | -2.08967 | 0.036647 | 1        |
| <i>SOX13</i>     | 0.158795 | 1.25311  | 2.98027 | -2.20917 | 0.027163 | 1        |
| <i>ERG</i>       | 0.392911 | 3.11978  | 2.98917 | -2.34943 | 0.018802 | 0.48754  |
| <i>TSPAN2</i>    | 2.69528  | 21.5036  | 2.99607 | -3.43825 | 0.000585 | 0.056261 |
| <i>B3GNT5</i>    | 0.479839 | 3.83248  | 2.99766 | -2.15513 | 0.031152 | 0.602371 |
| <i>RIMKLB</i>    | 0.164242 | 1.32504  | 3.01215 | -2.00201 | 0.045284 | 1        |
| <i>PDE4D</i>     | 1.31087  | 11.0215  | 3.07173 | -2.91758 | 0.003528 | 0.190918 |
| <i>LOC388387</i> | 0.32073  | 2.73723  | 3.09329 | -2.09817 | 0.03589  | 1        |
| <i>TRPM6</i>     | 0.103934 | 0.892455 | 3.10211 | -1.96311 | 0.049633 | 1        |
| <i>BPI</i>       | 20.9001  | 182.273  | 3.12452 | -3.38041 | 0.000724 | 0.066172 |
| <i>NELL2</i>     | 1.5132   | 13.2158  | 3.12659 | -2.52557 | 0.011551 | 0.366251 |
| <i>RALGPS2</i>   | 0.989144 | 9.24397  | 3.22426 | -3.30418 | 0.000953 | 0.08009  |
| <i>FCERIA</i>    | 1.3162   | 12.3605  | 3.23128 | -2.52011 | 0.011732 | 0.369498 |
| <i>MMP8</i>      | 21.1984  | 202.416  | 3.25529 | -3.0882  | 0.002014 | 0.132545 |
| <i>FAM84B</i>    | 0.170311 | 1.6449   | 3.27176 | -2.23899 | 0.025156 | 1        |
| <i>B3GNT7</i>    | 0.149098 | 1.47059  | 3.30206 | -2.29968 | 0.021467 | 1        |
| <i>FAM169A</i>   | 0.117    | 1.17072  | 3.32281 | -1.98568 | 0.047069 | 1        |
| <i>ZNF326</i>    | 0.795205 | 8.00577  | 3.33164 | -2.18778 | 0.028686 | 0.582181 |
| <i>NR3C2</i>     | 0.09376  | 0.957338 | 3.35199 | -2.03059 | 0.042296 | 1        |
| <i>CD69</i>      | 1.9456   | 20.31    | 3.3839  | -2.6969  | 0.006999 | 0.290342 |



|                |          |          |         |          |          |          |
|----------------|----------|----------|---------|----------|----------|----------|
| <i>ABCA13</i>  | 1.57161  | 16.4774  | 3.39017 | -3.48486 | 0.000492 | 0.051092 |
| <i>RTKN2</i>   | 0.129728 | 1.41562  | 3.44786 | -2.32198 | 0.020234 | 1        |
| <i>ARHGAP5</i> | 0.250806 | 2.79511  | 3.47826 | -2.66434 | 0.007714 | 1        |
| <i>ARL5B</i>   | 0.865307 | 10.7881  | 3.64009 | -3.21021 | 0.001326 | 0.097581 |
| <i>ZBTB10</i>  | 0.251735 | 3.33551  | 3.72793 | -2.74064 | 0.006132 | 0.263676 |
| <i>ARG1</i>    | 2.51963  | 33.4267  | 3.72972 | -2.23269 | 0.02557  | 0.56128  |
| <i>TMEM38B</i> | 0.194953 | 2.71715  | 3.8009  | -1.96084 | 0.049897 | 1        |
| <i>CDCA3</i>   | 0.175843 | 2.46901  | 3.81157 | -2.04616 | 0.040741 | 1        |
| <i>PMP22</i>   | 0.322184 | 4.5659   | 3.82494 | -2.01847 | 0.043543 | 0.694591 |
| <i>S100P</i>   | 6.36884  | 91.7699  | 3.84892 | -3.24224 | 0.001186 | 0.091339 |
| <i>LRRN1</i>   | 0.128282 | 1.90854  | 3.89508 | -2.45482 | 0.014096 | 1        |
| <i>SIGLEC1</i> | 2.52033  | 37.7222  | 3.90373 | -2.62224 | 0.008735 | 0.322313 |
| <i>NAPB</i>    | 0.214996 | 3.28393  | 3.93304 | -2.44781 | 0.014373 | 0.422958 |
| <i>CEP128</i>  | 0.078884 | 1.23791  | 3.97203 | -2.09289 | 0.036359 | 1        |
| <i>CUBN</i>    | 0.063483 | 1.01793  | 4.00311 | -2.80994 | 0.004955 | 1        |
| <i>SDK2</i>    | 0.016929 | 0.278087 | 4.03799 | -2.2023  | 0.027644 | 1        |
| <i>CDKI</i>    | 0.446129 | 7.5914   | 4.08883 | -2.06701 | 0.038733 | 0.672618 |
| <i>MRPS36</i>  | 0.276124 | 4.70294  | 4.09017 | -2.14225 | 0.032174 | 0.613316 |
| <i>GCNT4</i>   | 0.08817  | 1.52694  | 4.11421 | -2.17929 | 0.02931  | 1        |
| <i>ZSWIM5</i>  | 0.044401 | 0.787799 | 4.14915 | -2.23572 | 0.02537  | 1        |
| <i>SCN9A</i>   | 0.034815 | 0.652165 | 4.22748 | -2.25016 | 0.024439 | 1        |
| <i>LRRN3</i>   | 0.153946 | 2.90636  | 4.23871 | -2.20843 | 0.027214 | 1        |
| <i>HDC</i>     | 0.397738 | 7.67034  | 4.2694  | -2.42255 | 0.015412 | 0.43848  |
| <i>GLT25D2</i> | 0.048778 | 1.09099  | 4.48326 | -2.45112 | 0.014241 | 1        |
| <i>RPSAP58</i> | 0.249016 | 6.23628  | 4.64638 | -2.55369 | 0.010659 | 0.35343  |
| <i>RGMB</i>    | 0.062367 | 1.57474  | 4.6582  | -2.13486 | 0.032773 | 1        |
| <i>AIG1</i>    | 0.234681 | 6.12284  | 4.70543 | -2.57838 | 0.009926 | 0.337463 |
| <i>NR4A2</i>   | 0.335327 | 10.4136  | 4.95676 | -3.10463 | 0.001905 | 0.126346 |

|                 |          |         |         |          |          |          |
|-----------------|----------|---------|---------|----------|----------|----------|
| <i>GGT5</i>     | 0.100812 | 4.83477 | 5.58371 | -2.15849 | 0.03089  | 0.598537 |
| <i>ANKRD18A</i> | 0.046128 | 2.46526 | 5.73996 | -2.62209 | 0.008739 | 1        |
| <i>CPA3</i>     | 0.161059 | 9.59812 | 5.89709 | -3.31258 | 0.000924 | 0.078425 |

**S-Table 2. Reactome pathways enrichment analysis for PPI network**

| <b>Pathway</b>     | <b>Description</b>                                                                       | <b>Count in<br/>gene set</b> | <b>FDR</b> |
|--------------------|------------------------------------------------------------------------------------------|------------------------------|------------|
| <b>HSA-109582</b>  | Hemostasis                                                                               | 53 of 601                    | 7.71E-13   |
| <b>HSA-168256</b>  | Immune System                                                                            | 95 of 1925                   | 1.64E-09   |
| <b>HSA-6798695</b> | Neutrophil degranulation                                                                 | 35 of 471                    | 1.80E-06   |
| <b>HSA-202733</b>  | Cell surface interactions at the vascular wall                                           | 18 of 135                    | 2.69E-06   |
| <b>HSA-168249</b>  | Innate Immune System                                                                     | 55 of 1012                   | 2.69E-06   |
| <b>HSA-114608</b>  | Platelet degranulation                                                                   | 16 of 125                    | 2.20E-05   |
| <b>HSA-373760</b>  | L1CAM interactions                                                                       | 15 of 116                    | 3.62E-05   |
| <b>HSA-76002</b>   | Platelet activation, signaling and aggregation                                           | 22 of 256                    | 4.63E-05   |
| <b>HSA-8936459</b> | RUNX1 regulates genes involved in megakaryocyte<br>differentiation and platelet function | 10 of 66                     | 0.00080    |
| <b>HSA-6785807</b> | Interleukin-4 and Interleukin-13 signaling                                               | 12 of 106                    | 0.0014     |
| <b>HSA-983231</b>  | Factors involved in megakaryocyte development and<br>platelet production                 | 14 of 153                    | 0.0023     |
| <b>HSA-140877</b>  | Formation of Fibrin Clot (Clotting Cascade)                                              | 7 of 39                      | 0.0055     |
| <b>HSA-190840</b>  | Microtubule-dependent trafficking of connexons from<br>Golgi to the plasma membrane      | 5 of 17                      | 0.0078     |
| <b>HSA-1474244</b> | Extracellular matrix organization                                                        | 19 of 298                    | 0.0078     |
| <b>HSA-1247673</b> | Erythrocytes take up oxygen and release carbon<br>dioxide                                | 4 of 8                       | 0.0078     |
| <b>HSA-977225</b>  | Amyloid fiber formation                                                                  | 9 of 78                      | 0.0085     |

|                    |                                                           |           |        |
|--------------------|-----------------------------------------------------------|-----------|--------|
| <b>HSA-437239</b>  | Recycling pathway of L1                                   | 7 of 45   | 0.0085 |
| <b>HSA-389977</b>  | Post-chaperonin tubulin folding pathway                   | 5 of 20   | 0.0105 |
| <b>HSA-380108</b>  | Chemokine receptors bind chemokines                       | 7 of 48   | 0.0109 |
| <b>HSA-430116</b>  | GP1b-IX-V activation signalling                           | 4 of 11   | 0.0130 |
| <b>HSA-6803157</b> | Antimicrobial peptides                                    | 9 of 87   | 0.0141 |
| <b>HSA-8878171</b> | Transcriptional regulation by RUNX1                       | 14 of 201 | 0.0153 |
| <b>HSA-389960</b>  | Formation of tubulin folding intermediates by<br>CCT/TriC | 5 of 23   | 0.0153 |
| <b>HSA-382551</b>  | Transport of small molecules                              | 32 of 706 | 0.0153 |
| <b>HSA-1237044</b> | Erythrocytes take up carbon dioxide and release<br>oxygen | 4 of 12   | 0.0153 |
| <b>HSA-2559580</b> | Oxidative Stress Induced Senescence                       | 9 of 92   | 0.0163 |
| <b>HSA-422475</b>  | Axon guidance                                             | 26 of 541 | 0.0190 |
| <b>HSA-1566977</b> | Fibronectin matrix formation                              | 3 of 5    | 0.0190 |
| <b>HSA-1280218</b> | Adaptive Immune System                                    | 32 of 733 | 0.0212 |
| <b>HSA-6807878</b> | COPI-mediated anterograde transport                       | 9 of 99   | 0.0234 |
| <b>HSA-5626467</b> | RHO GTPases activate IQGAPs                               | 5 of 29   | 0.0273 |
| <b>HSA-189445</b>  | Metabolism of porphyrins                                  | 4 of 17   | 0.0312 |
| <b>HSA-445095</b>  | Interaction between L1 and Ankyrins                       | 5 of 31   | 0.0327 |
| <b>HSA-6811436</b> | COPI-independent Golgi-to-ER retrograde traffic           | 6 of 49   | 0.0384 |
| <b>HSA-380320</b>  | Recruitment of NuMA to mitotic centrosomes                | 8 of 91   | 0.0467 |
| <b>HSA-1280215</b> | Cytokine Signaling in Immune system                       | 28 of 654 | 0.0473 |

**S-Table 3. The type and frequency of *RHOC* neighbor gene alterations in LIHC of TCAG (cBioPortal).**

| <b>Gene<br/>Symbol</b> | <b>Amplification</b> | <b>Homozygous<br/>Deletion</b> | <b>Up-<br/>regulation</b> | <b>Down-<br/>regulation</b> | <b>Mutation</b> | <b>Total<br/>Alteration</b> |
|------------------------|----------------------|--------------------------------|---------------------------|-----------------------------|-----------------|-----------------------------|
| <i>RHOC</i>            | 0.0%                 | 0.0%                           | 6.1%                      | 0.0%                        | 0.3%            | 6.4%                        |
| <i>PTK2</i>            | 13.6%                | 0.3%                           | 34.6%                     | 0.5%                        | 2.0%            | 39.4%                       |
| <i>PIP5K1A</i>         | 10.0%                | 0.0%                           | 18.3%                     | 1.6%                        | 0.0%            | 24.2%                       |
| <i>ARHGAP39</i>        | 13.3%                | 0.0%                           | 15.6%                     | 0.0%                        | 1.4%            | 23.8%                       |
| <i>ARHGEF11</i>        | 10.4%                | 0.0%                           | 26.5%                     | 0.5%                        | 1.4%            | 32.1%                       |

**S-Table 4. Frequency and type of alterations of co-expression genes with *RHOC* for hepatic carcinoma with metastasis in LIHC of TCAG.**

| <b>Gene<br/>symbol</b> | <b>Total<br/>alteration</b> | <b>Amplification</b> | <b>Homozygous<br/>Deletion</b> | <b>Dysregulation</b> |             | <b>Mutation</b> | <b>Interaction<br/>with <i>RHOC</i></b> |
|------------------------|-----------------------------|----------------------|--------------------------------|----------------------|-------------|-----------------|-----------------------------------------|
|                        |                             |                      |                                | <b>Up</b>            | <b>Down</b> |                 |                                         |
| <i>GPX1</i>            | 4.3%                        | 0.7%                 | 0.25                           | 3.6%                 | 0%          | 0%              | RNA-RNA                                 |
| <i>FKBP8</i>           | 5.9%                        | 1.4%                 | 0%                             | 5.0%                 | 0%          | 0.2%            | RNA-RNA<br>/ceRNA                       |
| <i>TFDP1</i>           | 10.6%                       | 2.9%                 | 0.2%                           | 9.3%                 | 0%          | 0.5%            | RNA-RNA                                 |
| <i>APOL2</i>           | 4.0%                        | 0.5%                 | 0%                             | 3.2%                 | 0%          | 0.2%            | RNA-RNA                                 |
| <i>DCAF12</i>          | 9.3%                        | 0.8%                 | 0%                             | 5.6%                 | 3.2%        | 0.2%            | ceRNA                                   |
| <i>SCN1B</i>           | 4.2%                        | 1.3%                 | 0%                             | 2.4%                 | 0%          | 0.2%            | ceRNA                                   |
| <i>FOXO3</i>           | 8.0%                        | 0.2%                 | 1.6%                           | 6.3%                 | 0%          | 0%              | ceRNA                                   |
| <i>GAS2L1</i>          | 8.2%                        | 0.5%                 | 0.2%                           | 7.4%                 | 0%          | 0.5%            | ceRNA                                   |
| <i>TSTA3</i>           | 28.6%                       | 15.9%                | 0%                             | 21%                  | 0%          | 0.8%            | ceRNA                                   |
| <i>MYL9</i>            | 1.1%                        | 0.5%                 | 0%                             | 0.5%                 | 0%          | 0%              | ceRNA                                   |
| <i>MAP2K3</i>          | 5.3%                        | 1.6%                 | 0.8%                           | 2.9%                 | 0%          | 0.5%            | ceRNA                                   |
| <i>TNSI</i>            | 6.0%                        | 0.5%                 | 0.2%                           | 2.8%                 | 0%          | 2.1%            | ceRNA                                   |
| <i>TSPAN9</i>          | 4.8%                        | 0.2%                 | 0.2%                           | 4.2%                 | 0%          | 0.2%            | ceRNA                                   |

|               |       |       |      |      |      |      |       |
|---------------|-------|-------|------|------|------|------|-------|
| <i>EHD3</i>   | 6.4%  | 1.1%  | 0%   | 5.0% | 0%   | 0.2% | ceRNA |
| <i>ASCC2</i>  | 13.5% | 0.5%  | 0.2% | 7.2% | 5.6% | 0.5% | ceRNA |
| <i>TGM2</i>   | 5.6%  | 1.3%  | 0%   | 4.0% | 0%   | 0.2% | ceRNA |
| <i>PEAR1</i>  | 14.3% | 12.2% | 0%   | 1.3% | 0%   | 1.1% | ceRNA |
| <i>BCL2L1</i> | 7.6%  | 1.1%  | 0%   | 7.2% | 0%   | 0%   | ceRNA |

S-Table 5. The *RHOC* expression level and tumor purity (TCGA)

| Samples      | <i>RHOC</i> | Tumor purity |
|--------------|-------------|--------------|
| TCGA.2Y.A9GS | 12.3917     | 0.591500     |
| TCGA.2Y.A9GT | 11.6125     | 0.671800     |
| TCGA.2Y.A9GU | 11.9869     | 0.934200     |
| TCGA.2Y.A9GV | 11.5488     | 0.753500     |
| TCGA.2Y.A9GW | 12.4983     | 0.668500     |
| TCGA.2Y.A9GX | 12.0334     | 0.537300     |
| TCGA.2Y.A9GY | 12.6271     | 0.760900     |
| TCGA.2Y.A9GZ | 11.7835     | 0.836000     |
| TCGA.2Y.A9H0 | 12.3748     | 0.867600     |
| TCGA.2Y.A9H1 | 13.5028     | 0.815900     |
| TCGA.2Y.A9H2 | 12.5971     | 0.872600     |
| TCGA.2Y.A9H3 | 13.5304     | 0.650000     |
| TCGA.2Y.A9H4 | 12.5981     | 0.858500     |
| TCGA.2Y.A9H5 | 11.7580     | 0.812400     |
| TCGA.2Y.A9H6 | 12.3666     | 0.759900     |
| TCGA.2Y.A9H7 | 11.0587     | 0.861800     |
| TCGA.2Y.A9H8 | 12.3800     | 0.791300     |
| TCGA.2Y.A9H9 | 12.4621     | 0.791300     |
| TCGA.2Y.A9HA | 12.0424     | 0.921500     |

---

|                     |         |          |
|---------------------|---------|----------|
| <b>TCGA.2Y.A9HB</b> | 12.3021 | 0.701900 |
| <b>TCGA.3K.AAZ8</b> | 11.8736 | 0.884200 |
| <b>TCGA.4R.AA8I</b> | 12.2285 | 0.882900 |
| <b>TCGA.5C.A9VG</b> | 11.0974 | 0.880600 |
| <b>TCGA.5C.A9VH</b> | 12.3800 | 0.865400 |
| <b>TCGA.5R.AA1C</b> | 12.4409 | 0.836300 |
| <b>TCGA.5R.AA1D</b> | 12.1862 | 0.683900 |
| <b>TCGA.5R.AAAM</b> | 12.1528 | 0.765300 |
| <b>TCGA.BC.4072</b> | 12.5292 | 0.553100 |
| <b>TCGA.BC.4073</b> | 12.0703 | 0.614800 |
| <b>TCGA.BC.A10Q</b> | 13.6859 | 0.874700 |
| <b>TCGA.BC.A10R</b> | 12.6222 | 0.834400 |
| <b>TCGA.BC.A10S</b> | 12.9243 | 0.750200 |
| <b>TCGA.BC.A10T</b> | 12.6342 | 0.722900 |
| <b>TCGA.BC.A10U</b> | 12.9151 | 0.925300 |
| <b>TCGA.BC.A10W</b> | 12.9664 | 0.825900 |
| <b>TCGA.BC.A10X</b> | 12.2263 | 0.715200 |
| <b>TCGA.BC.A10Y</b> | 12.1408 | 0.725600 |
| <b>TCGA.BC.A10Z</b> | 12.4428 | 0.925300 |
| <b>TCGA.BC.A110</b> | 12.5644 | 0.563000 |
| <b>TCGA.BC.A112</b> | 12.9291 | 0.880600 |
| <b>TCGA.BC.A216</b> | 11.7007 | 0.850800 |
| <b>TCGA.BC.A217</b> | 11.7426 | 0.718800 |
| <b>TCGA.BC.A3KG</b> | 10.7330 | 0.922500 |
| <b>TCGA.BC.A5W4</b> | 12.6699 | 0.976300 |
| <b>TCGA.BC.A69H</b> | 13.2485 | 0.756500 |
| <b>TCGA.BC.A69I</b> | 12.4877 | 0.814800 |
| <b>TCGA.BC.A8YO</b> | 10.7979 | 0.669300 |

---

---

|                     |         |          |
|---------------------|---------|----------|
| <b>TCGA.BD.A2L6</b> | 11.9055 | 0.754700 |
| <b>TCGA.BD.A3EP</b> | 12.5828 | 0.654100 |
| <b>TCGA.BD.A3ER</b> | 12.5212 | 0.718800 |
| <b>TCGA.CC.5258</b> | 11.6067 | 0.738400 |
| <b>TCGA.CC.5259</b> | 12.9396 | 0.723400 |
| <b>TCGA.CC.5260</b> | 13.1110 | 0.762800 |
| <b>TCGA.CC.5261</b> | 10.9101 | 0.707600 |
| <b>TCGA.CC.5262</b> | 13.1854 | 0.689800 |
| <b>TCGA.CC.5263</b> | 12.6210 | 0.701100 |
| <b>TCGA.CC.5264</b> | 13.1966 | 0.858300 |
| <b>TCGA.CC.A123</b> | 12.0906 | 0.887900 |
| <b>TCGA.CC.A1HT</b> | 12.2329 | 0.559800 |
| <b>TCGA.CC.A3M9</b> | 13.2106 | 0.273800 |
| <b>TCGA.CC.A3MA</b> | 12.6588 | 0.881100 |
| <b>TCGA.CC.A3MB</b> | 12.4734 | 0.836000 |
| <b>TCGA.CC.A3MC</b> | 12.1141 | 0.850900 |
| <b>TCGA.CC.A5UC</b> | 12.2304 | 0.836400 |
| <b>TCGA.CC.A5UD</b> | 12.7120 | 0.924100 |
| <b>TCGA.CC.A5UE</b> | 13.5895 | 0.791300 |
| <b>TCGA.CC.A7IE</b> | 11.9762 | 0.786800 |
| <b>TCGA.CC.A7IF</b> | 11.6653 | 0.941100 |
| <b>TCGA.CC.A7IG</b> | 13.1764 | 0.864400 |
| <b>TCGA.CC.A7IH</b> | 11.8794 | 0.844800 |
| <b>TCGA.CC.A7II</b> | 12.6102 | 0.667700 |
| <b>TCGA.CC.A7IJ</b> | 12.7718 | 0.536000 |
| <b>TCGA.CC.A7IK</b> | 12.1363 | 0.791300 |
| <b>TCGA.CC.A7IL</b> | 13.6688 | 0.791300 |
| <b>TCGA.CC.A8HS</b> | 10.8984 | 0.949200 |

---

---

|                     |         |          |
|---------------------|---------|----------|
| <b>TCGA.CC.A8HT</b> | 11.9141 | 0.375500 |
| <b>TCGA.CC.A8HU</b> | 12.0791 | 0.791300 |
| <b>TCGA.CC.A8HV</b> | 12.1041 | 0.873100 |
| <b>TCGA.CC.A9FS</b> | 12.3260 | 0.880600 |
| <b>TCGA.CC.A9FW</b> | 12.1867 | 0.654200 |
| <b>TCGA.DD.A113</b> | 12.1793 | 0.855500 |
| <b>TCGA.DD.A114</b> | 12.1157 | 0.582500 |
| <b>TCGA.DD.A115</b> | 13.0418 | 0.607900 |
| <b>TCGA.DD.A116</b> | 12.6877 | 0.846100 |
| <b>TCGA.DD.A118</b> | 12.8952 | 0.842700 |
| <b>TCGA.DD.A119</b> | 12.8406 | 0.843400 |
| <b>TCGA.DD.A11A</b> | 12.0758 | 0.836000 |
| <b>TCGA.DD.A11C</b> | 11.1142 | 0.786100 |
| <b>TCGA.DD.A11D</b> | 12.4277 | 0.880500 |
| <b>TCGA.DD.A1EA</b> | 11.3730 | 0.689300 |
| <b>TCGA.DD.A1EB</b> | 12.7182 | 0.899400 |
| <b>TCGA.DD.A1EC</b> | 11.8585 | 0.500000 |
| <b>TCGA.DD.A1ED</b> | 11.9706 | 0.676400 |
| <b>TCGA.DD.A1EE</b> | 12.0690 | 0.870500 |
| <b>TCGA.DD.A1EF</b> | 12.0321 | 0.774900 |
| <b>TCGA.DD.A1EG</b> | 12.7719 | 0.685900 |
| <b>TCGA.DD.A1EH</b> | 10.7517 | 0.883100 |
| <b>TCGA.DD.A1EI</b> | 12.7439 | 0.699000 |
| <b>TCGA.DD.A1EJ</b> | 11.8088 | 0.880600 |
| <b>TCGA.DD.A1EK</b> | 12.3469 | 0.629100 |
| <b>TCGA.DD.A1EL</b> | 12.7638 | 0.615100 |
| <b>TCGA.DD.A39V</b> | 13.1470 | 0.735500 |
| <b>TCGA.DD.A39W</b> | 11.6252 | 0.917600 |

---



---

|                     |         |          |
|---------------------|---------|----------|
| <b>TCGA.DD.A39X</b> | 12.8193 | 0.765900 |
| <b>TCGA.DD.A39Y</b> | 14.4440 | 0.898500 |
| <b>TCGA.DD.A39Z</b> | 12.8357 | 0.826800 |
| <b>TCGA.DD.A3A1</b> | 14.1520 | 0.518600 |
| <b>TCGA.DD.A3A2</b> | 12.4954 | 0.873200 |
| <b>TCGA.DD.A3A3</b> | 13.3141 | 0.929100 |
| <b>TCGA.DD.A3A4</b> | 10.9798 | 0.887000 |
| <b>TCGA.DD.A3A5</b> | 13.4206 | 0.813500 |
| <b>TCGA.DD.A3A6</b> | 14.0693 | 0.408300 |
| <b>TCGA.DD.A3A7</b> | 12.6474 | 0.912100 |
| <b>TCGA.DD.A3A9</b> | 13.5908 | 0.867200 |
| <b>TCGA.DD.A4NA</b> | 12.9277 | 0.824000 |
| <b>TCGA.DD.A4NB</b> | 12.3249 | 0.613000 |
| <b>TCGA.DD.A4ND</b> | 11.8237 | 0.631100 |
| <b>TCGA.DD.A4NE</b> | 11.1332 | 0.903000 |
| <b>TCGA.DD.A4NF</b> | 11.3725 | 0.882000 |
| <b>TCGA.DD.A4NG</b> | 11.8424 | 0.870400 |
| <b>TCGA.DD.A4NH</b> | 11.4920 | 0.473000 |
| <b>TCGA.DD.A4NI</b> | 12.1191 | 0.739600 |
| <b>TCGA.DD.A4NJ</b> | 12.0235 | 0.700000 |
| <b>TCGA.DD.A4NK</b> | 12.1486 | 0.715600 |
| <b>TCGA.DD.A4NL</b> | 12.0793 | 0.810800 |
| <b>TCGA.DD.A4NN</b> | 11.3792 | 0.931100 |
| <b>TCGA.DD.A4NO</b> | 12.4478 | 0.848900 |
| <b>TCGA.DD.A4NP</b> | 11.7474 | 0.879300 |
| <b>TCGA.DD.A4NQ</b> | 12.4979 | 0.869300 |
| <b>TCGA.DD.A4NS</b> | 12.1129 | 0.629600 |
| <b>TCGA.DD.A4NV</b> | 11.8842 | 0.620300 |

---

---

|                     |         |          |
|---------------------|---------|----------|
| <b>TCGA.DD.A73A</b> | 12.4001 | 0.847700 |
| <b>TCGA.DD.A73B</b> | 11.9955 | 0.942600 |
| <b>TCGA.DD.A73C</b> | 11.3601 | 0.825800 |
| <b>TCGA.DD.A73D</b> | 11.5955 | 0.941500 |
| <b>TCGA.DD.A73E</b> | 11.7744 | 0.870000 |
| <b>TCGA.DD.A73F</b> | 12.1804 | 0.526000 |
| <b>TCGA.DD.A73G</b> | 14.4612 | 0.845700 |
| <b>TCGA.DD.AA3A</b> | 12.5485 | 0.883700 |
| <b>TCGA.DD.AAC9</b> | 13.2684 | 0.814700 |
| <b>TCGA.DD.AACA</b> | 11.5015 | 0.923000 |
| <b>TCGA.DD.AACB</b> | 12.1635 | 0.778100 |
| <b>TCGA.DD.AACC</b> | 11.9224 | 0.553400 |
| <b>TCGA.DD.AACD</b> | 13.1914 | 0.851000 |
| <b>TCGA.DD.AACE</b> | 11.5346 | 0.840500 |
| <b>TCGA.DD.AACF</b> | 12.2306 | 0.828500 |
| <b>TCGA.DD.AACG</b> | 12.8097 | 0.838700 |
| <b>TCGA.DD.AACH</b> | 12.9407 | 0.785500 |
| <b>TCGA.DD.AACI</b> | 13.7905 | 0.669900 |
| <b>TCGA.DD.AACJ</b> | 12.8911 | 0.796000 |
| <b>TCGA.DD.AACL</b> | 11.9437 | 0.743500 |
| <b>TCGA.DD.AACN</b> | 11.2118 | 0.853500 |
| <b>TCGA.DD.AACO</b> | 12.4019 | 0.865200 |
| <b>TCGA.DD.AACP</b> | 12.3047 | 0.949400 |
| <b>TCGA.DD.AACQ</b> | 11.9941 | 0.903000 |
| <b>TCGA.DD.AACS</b> | 11.8286 | 0.891300 |
| <b>TCGA.DD.AACT</b> | 12.2909 | 0.807900 |
| <b>TCGA.DD.AACU</b> | 12.8060 | 0.805200 |
| <b>TCGA.DD.AACV</b> | 12.2612 | 0.882200 |

---

---

|                     |         |          |
|---------------------|---------|----------|
| <b>TCGA.DD.AACW</b> | 10.2297 | 0.854700 |
| <b>TCGA.DD.AACX</b> | 12.4961 | 0.790500 |
| <b>TCGA.DD.AACY</b> | 12.1507 | 0.907700 |
| <b>TCGA.DD.AACZ</b> | 12.8716 | 0.696400 |
| <b>TCGA.DD.AAD0</b> | 12.0674 | 0.939400 |
| <b>TCGA.DD.AAD1</b> | 11.7904 | 0.770200 |
| <b>TCGA.DD.AAD2</b> | 12.8361 | 0.766900 |
| <b>TCGA.DD.AAD3</b> | 12.0702 | 0.773200 |
| <b>TCGA.DD.AAD5</b> | 13.2095 | 0.818000 |
| <b>TCGA.DD.AAD6</b> | 11.3165 | 0.890100 |
| <b>TCGA.DD.AAD8</b> | 12.4998 | 0.782900 |
| <b>TCGA.DD.AADA</b> | 12.2591 | 0.842100 |
| <b>TCGA.DD.AADB</b> | 11.5231 | 0.866800 |
| <b>TCGA.DD.AADC</b> | 12.3175 | 0.907900 |
| <b>TCGA.DD.AADD</b> | 11.4056 | 0.939000 |
| <b>TCGA.DD.AADF</b> | 12.0514 | 0.906800 |
| <b>TCGA.DD.AADG</b> | 11.6956 | 0.934400 |
| <b>TCGA.DD.AADI</b> | 12.4933 | 0.762200 |
| <b>TCGA.DD.AADJ</b> | 11.6001 | 0.798000 |
| <b>TCGA.DD.AADK</b> | 13.2837 | 0.765800 |
| <b>TCGA.DD.AADL</b> | 12.4386 | 0.893700 |
| <b>TCGA.DD.AADN</b> | 13.3961 | 0.762800 |
| <b>TCGA.DD.AADO</b> | 12.6865 | 0.836800 |
| <b>TCGA.DD.AADP</b> | 11.6718 | 0.856600 |
| <b>TCGA.DD.AADQ</b> | 12.8798 | 0.843400 |
| <b>TCGA.DD.AADR</b> | 12.5862 | 0.740800 |
| <b>TCGA.DD.AADS</b> | 13.7990 | 0.802200 |
| <b>TCGA.DD.AADU</b> | 12.1546 | 0.887100 |

---

---

|                     |         |          |
|---------------------|---------|----------|
| <b>TCGA.DD.AADV</b> | 12.6969 | 0.658200 |
| <b>TCGA.DD.AADW</b> | 10.8974 | 0.901300 |
| <b>TCGA.DD.AADY</b> | 11.6964 | 0.852900 |
| <b>TCGA.DD.AAE0</b> | 12.0159 | 0.910000 |
| <b>TCGA.DD.AAE1</b> | 11.2075 | 0.757000 |
| <b>TCGA.DD.AAE2</b> | 11.6555 | 0.706000 |
| <b>TCGA.DD.AAE3</b> | 13.6849 | 0.878700 |
| <b>TCGA.DD.AAE4</b> | 12.7287 | 0.612700 |
| <b>TCGA.DD.AAE6</b> | 12.6243 | 0.844800 |
| <b>TCGA.DD.AAE7</b> | 12.2913 | 0.762700 |
| <b>TCGA.DD.AAE9</b> | 12.8618 | 0.888300 |
| <b>TCGA.DD.AAEA</b> | 12.0909 | 0.853300 |
| <b>TCGA.DD.AAEB</b> | 11.7077 | 0.835400 |
| <b>TCGA.DD.AAED</b> | 12.4585 | 0.845400 |
| <b>TCGA.DD.AAEE</b> | 13.5753 | 0.837700 |
| <b>TCGA.DD.AAEG</b> | 11.7930 | 0.916400 |
| <b>TCGA.DD.AAEH</b> | 11.7375 | 0.739700 |
| <b>TCGA.DD.AAEI</b> | 12.4983 | 0.830200 |
| <b>TCGA.DD.AAEK</b> | 10.9316 | 0.737500 |
| <b>TCGA.DD.AAVP</b> | 12.8766 | 0.859100 |
| <b>TCGA.DD.AAVQ</b> | 11.4890 | 0.644600 |
| <b>TCGA.DD.AAVR</b> | 13.2153 | 0.760600 |
| <b>TCGA.DD.AAVS</b> | 12.2085 | 0.904300 |
| <b>TCGA.DD.AAVU</b> | 12.8175 | 0.905500 |
| <b>TCGA.DD.AAVV</b> | 12.9629 | 0.795600 |
| <b>TCGA.DD.AAVW</b> | 11.8565 | 0.700100 |
| <b>TCGA.DD.AAVX</b> | 12.5016 | 0.746000 |
| <b>TCGA.DD.AAVY</b> | 12.4328 | 0.846300 |

---

---

|                     |         |          |
|---------------------|---------|----------|
| <b>TCGA.DD.AAVZ</b> | 10.9655 | 0.818600 |
| <b>TCGA.DD.AAW0</b> | 12.2422 | 0.756300 |
| <b>TCGA.DD.AAW1</b> | 11.5947 | 0.854100 |
| <b>TCGA.DD.AAW2</b> | 12.9607 | 0.921000 |
| <b>TCGA.DD.AAW3</b> | 12.4856 | 0.881000 |
| <b>TCGA.ED.A459</b> | 13.2191 | 0.689200 |
| <b>TCGA.ED.A4XI</b> | 12.4411 | 0.741600 |
| <b>TCGA.ED.A5KG</b> | 11.3591 | 0.260100 |
| <b>TCGA.ED.A627</b> | 12.3834 | 0.508100 |
| <b>TCGA.ED.A66X</b> | 11.9975 | 0.605800 |
| <b>TCGA.ED.A66Y</b> | 10.5000 | 0.970600 |
| <b>TCGA.ED.A7PY</b> | 11.5003 | 0.954200 |
| <b>TCGA.ED.A7XO</b> | 13.2243 | 0.783200 |
| <b>TCGA.ED.A7XP</b> | 12.9325 | 0.823500 |
| <b>TCGA.ED.A82E</b> | 14.3457 | 0.880600 |
| <b>TCGA.ED.A805</b> | 12.1553 | 0.912100 |
| <b>TCGA.ED.A806</b> | 12.1057 | 0.773100 |
| <b>TCGA.EP.A12J</b> | 11.3991 | 0.901100 |
| <b>TCGA.EP.A26S</b> | 12.2437 | 0.880600 |
| <b>TCGA.EP.A2KA</b> | 12.5653 | 0.668100 |
| <b>TCGA.EP.A2KB</b> | 11.7128 | 0.928300 |
| <b>TCGA.EP.A3JL</b> | 13.0722 | 0.697400 |
| <b>TCGA.EP.A3RK</b> | 12.9917 | 0.634400 |
| <b>TCGA.ES.A2HS</b> | 12.6810 | 0.881900 |
| <b>TCGA.ES.A2HT</b> | 13.8918 | 0.783400 |
| <b>TCGA.FV.A23B</b> | 11.3528 | 0.847500 |
| <b>TCGA.FV.A2QQ</b> | 13.2466 | 0.803600 |
| <b>TCGA.FV.A2QR</b> | 12.8318 | 0.638300 |

---

---

|                     |         |          |
|---------------------|---------|----------|
| <b>TCGA.FV.A3I0</b> | 13.6654 | 0.880600 |
| <b>TCGA.FV.A3I1</b> | 12.7321 | 0.640300 |
| <b>TCGA.FV.A3R2</b> | 12.9649 | 0.880600 |
| <b>TCGA.FV.A3R3</b> | 12.8726 | 0.683700 |
| <b>TCGA.FV.A4ZP</b> | 13.9481 | 0.784400 |
| <b>TCGA.G3.A25S</b> | 13.5516 | 0.791300 |
| <b>TCGA.G3.A25T</b> | 13.9806 | 0.854600 |
| <b>TCGA.G3.A25U</b> | 11.4881 | 0.859900 |
| <b>TCGA.G3.A25V</b> | 12.5554 | 0.445300 |
| <b>TCGA.G3.A25X</b> | 13.5818 | 0.690800 |
| <b>TCGA.G3.A25Y</b> | 11.6238 | 0.794900 |
| <b>TCGA.G3.A25Z</b> | 12.5571 | 0.835300 |
| <b>TCGA.G3.A3CG</b> | 12.3457 | 0.832700 |
| <b>TCGA.G3.A3CH</b> | 11.8262 | 0.846200 |
| <b>TCGA.G3.A3CI</b> | 11.3958 | 0.522200 |
| <b>TCGA.G3.A3CJ</b> | 12.9107 | 0.880600 |
| <b>TCGA.G3.A3CK</b> | 12.2863 | 0.837400 |
| <b>TCGA.G3.A5SI</b> | 12.1980 | 0.946800 |
| <b>TCGA.G3.A5SJ</b> | 13.2044 | 0.657300 |
| <b>TCGA.G3.A5SK</b> | 11.6034 | 0.698200 |
| <b>TCGA.G3.A5SL</b> | 11.8426 | 0.880600 |
| <b>TCGA.G3.A5SM</b> | 12.5156 | 0.631300 |
| <b>TCGA.G3.A6UC</b> | 12.1590 | 0.758200 |
| <b>TCGA.G3.A7M5</b> | 12.2454 | 0.893200 |
| <b>TCGA.G3.A7M6</b> | 12.1306 | 0.878400 |
| <b>TCGA.G3.A7M7</b> | 13.3845 | 0.836000 |
| <b>TCGA.G3.A7M8</b> | 11.7331 | 0.756100 |
| <b>TCGA.G3.A7M9</b> | 12.0836 | 0.653500 |

---

---

|                     |         |          |
|---------------------|---------|----------|
| <b>TCGA.G3.AAUZ</b> | 12.5551 | 0.776200 |
| <b>TCGA.G3.AAV0</b> | 11.4513 | 0.836000 |
| <b>TCGA.G3.AAV1</b> | 12.6519 | 0.791300 |
| <b>TCGA.G3.AAV2</b> | 11.9635 | 0.816500 |
| <b>TCGA.G3.AAV3</b> | 12.1747 | 0.459100 |
| <b>TCGA.G3.AAV5</b> | 12.6366 | 0.746600 |
| <b>TCGA.G3.AAV6</b> | 10.9863 | 0.723100 |
| <b>TCGA.G3.AAV7</b> | 12.8522 | 0.701900 |
| <b>TCGA.GJ.A3OU</b> | 12.0561 | 0.422300 |
| <b>TCGA.GJ.A6C0</b> | 12.1290 | 0.670000 |
| <b>TCGA.GJ.A9DB</b> | 12.7057 | 0.791300 |
| <b>TCGA.HP.A5MZ</b> | 12.7748 | 0.575300 |
| <b>TCGA.HP.A5N0</b> | 12.4128 | 0.746600 |
| <b>TCGA.K7.A5RF</b> | 12.0228 | 0.665200 |
| <b>TCGA.K7.A5RG</b> | 12.6313 | 0.324700 |
| <b>TCGA.K7.A6G5</b> | 12.9782 | 0.746600 |
| <b>TCGA.K7.AAU7</b> | 12.7700 | 0.638600 |
| <b>TCGA.KR.A7K0</b> | 12.1258 | 0.852200 |
| <b>TCGA.KR.A7K2</b> | 12.4495 | 0.820000 |
| <b>TCGA.KR.A7K7</b> | 12.4129 | 0.791300 |
| <b>TCGA.KR.A7K8</b> | 12.0537 | 0.367800 |
| <b>TCGA.LG.A6GG</b> | 12.8698 | 0.723700 |
| <b>TCGA.LG.A9QC</b> | 11.7837 | 0.875900 |
| <b>TCGA.LG.A9QD</b> | 11.9859 | 0.861300 |
| <b>TCGA.MI.A75C</b> | 12.7532 | 0.769300 |
| <b>TCGA.MI.A75E</b> | 12.7973 | 0.765600 |
| <b>TCGA.MI.A75G</b> | 13.2315 | 0.934200 |
| <b>TCGA.MI.A75H</b> | 11.8093 | 0.669900 |

---

---

|                     |         |          |
|---------------------|---------|----------|
| <b>TCGA.MI.A75I</b> | 12.5594 | 0.701900 |
| <b>TCGA.MR.A520</b> | 11.3403 | 0.702700 |
| <b>TCGA.MR.A8JO</b> | 12.6900 | 0.563500 |
| <b>TCGA.NI.A4U2</b> | 12.2800 | 0.859900 |
| <b>TCGA.NI.A8LF</b> | 12.4954 | 0.782100 |
| <b>TCGA.O8.A75V</b> | 12.7134 | 0.639800 |
| <b>TCGA.PD.A5DF</b> | 12.8323 | 0.719200 |
| <b>TCGA.QA.A7B7</b> | 10.5139 | 0.791300 |
| <b>TCGA.RC.A7S9</b> | 12.0105 | 0.895100 |
| <b>TCGA.RC.A7SB</b> | 12.0643 | 0.791300 |
| <b>TCGA.RC.A7SF</b> | 12.6550 | 0.791300 |
| <b>TCGA.RC.A7SH</b> | 11.5408 | 0.942600 |
| <b>TCGA.RC.A7SK</b> | 12.9672 | 0.925300 |
| <b>TCGA.RG.A7D4</b> | 10.9697 | 0.475100 |
| <b>TCGA.UB.A7MA</b> | 12.5668 | 0.903800 |
| <b>TCGA.UB.A7MB</b> | 11.2861 | 0.922400 |
| <b>TCGA.UB.A7MC</b> | 11.8879 | 0.827200 |
| <b>TCGA.UB.A7MD</b> | 13.2313 | 0.768000 |
| <b>TCGA.UB.A7ME</b> | 12.0378 | 0.746600 |
| <b>TCGA.UB.A7MF</b> | 12.9319 | 0.745300 |
| <b>TCGA.UB.AA0U</b> | 11.8004 | 0.746700 |
| <b>TCGA.UB.AA0V</b> | 11.7976 | 0.755200 |
| <b>TCGA.WJ.A86L</b> | 11.8867 | 0.880600 |
| <b>TCGA.WQ.A9G7</b> | 12.4189 | 0.810100 |
| <b>TCGA.WQ.AB4B</b> | 13.2373 | 0.866300 |
| <b>TCGA.WX.AA44</b> | 11.8064 | 0.755300 |
| <b>TCGA.WX.AA46</b> | 12.1503 | 0.822300 |
| <b>TCGA.WX.AA47</b> | 11.0875 | 0.904100 |

---



---

|                     |         |          |
|---------------------|---------|----------|
| <b>TCGA.XR.A8TC</b> | 10.6463 | 0.899100 |
| <b>TCGA.XR.A8TD</b> | 12.5747 | 0.542700 |
| <b>TCGA.XR.A8TE</b> | 11.5106 | 0.731700 |
| <b>TCGA.XR.A8TF</b> | 11.8498 | 0.791300 |
| <b>TCGA.XR.A8TG</b> | 12.4604 | 0.685900 |
| <b>TCGA.YA.A8S7</b> | 13.6893 | 0.568800 |
| <b>TCGA.ZP.A9CV</b> | 12.5505 | 0.751600 |
| <b>TCGA.ZP.A9CY</b> | 12.4063 | 0.778500 |
| <b>TCGA.ZP.A9CZ</b> | 12.0092 | 0.749400 |
| <b>TCGA.ZP.A9D0</b> | 12.9662 | 0.906500 |
| <b>TCGA.ZP.A9D2</b> | 11.9340 | 0.791300 |
| <b>TCGA.ZP.A9D4</b> | 12.0105 | 0.791300 |
| <b>TCGA.ZS.A9CD</b> | 12.9065 | 0.615200 |
| <b>TCGA.ZS.A9CE</b> | 11.5993 | 0.746600 |
| <b>TCGA.ZS.A9CF</b> | 12.1799 | 0.811600 |
| <b>TCGA.ZS.A9CG</b> | 12.3907 | 0.887600 |

---

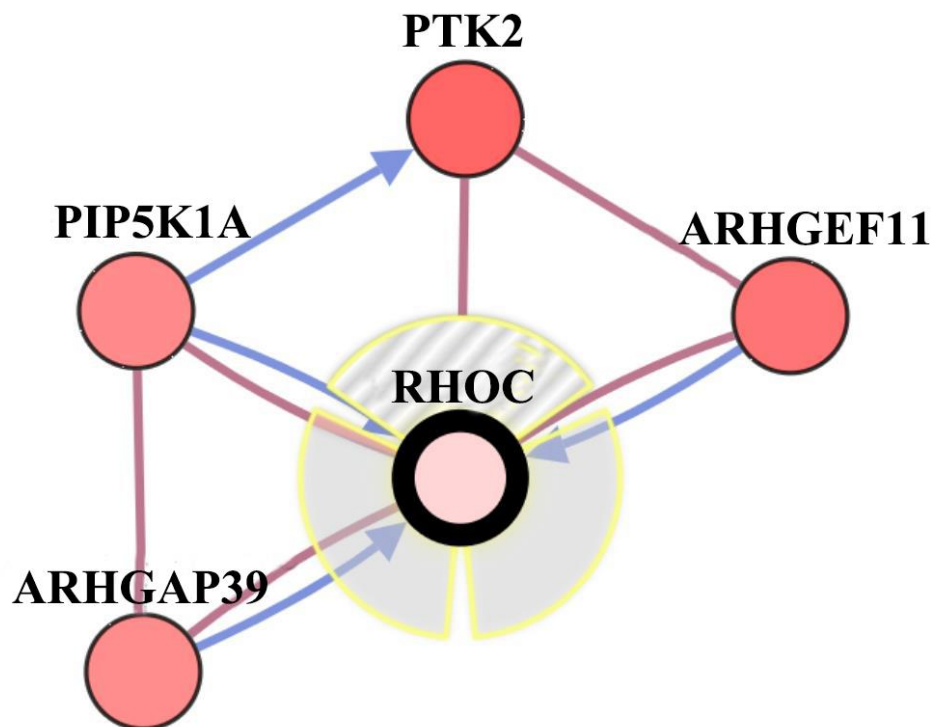

**S-Figure 1. Network view of the *RHOC*-neighboring genes in LIHC of TCAG (cBioPortal).** *RHOC* are seed genes (indicated with thick border), and all other genes are automatically identified as altered in LIHC (frequencies >20%). Darker red indicates increased frequency of alteration in LIHC. The interaction types are derived from the Biological Pathway Exchange (BioPAX): the blue connection indicates that the first protein controls a reaction that changes the state of the second protein; the red connection indicates that the proteins are members of the same complex.

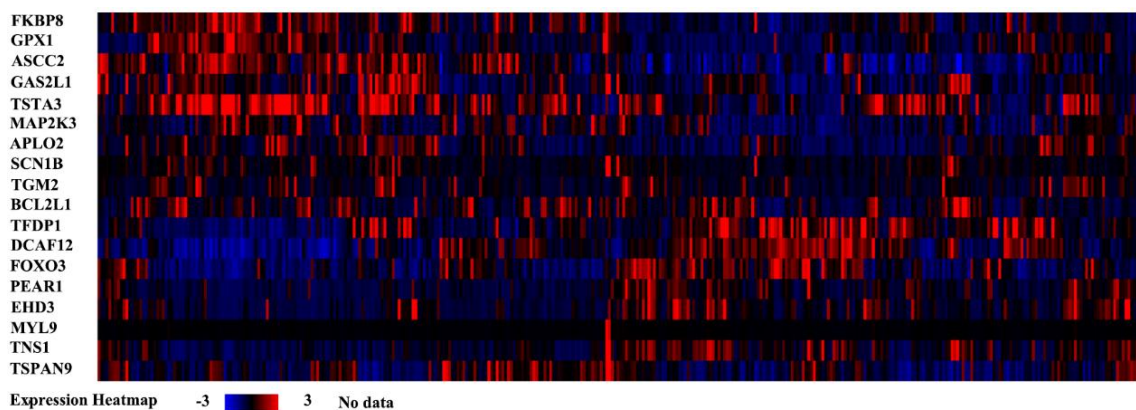

**S-Figure 2. Expression heatmap of 18 co-expression genes with *RHOC* in LIHC of TCAG (cBioPortal).**

Gene expression level was represented as log<sub>2</sub> FC.

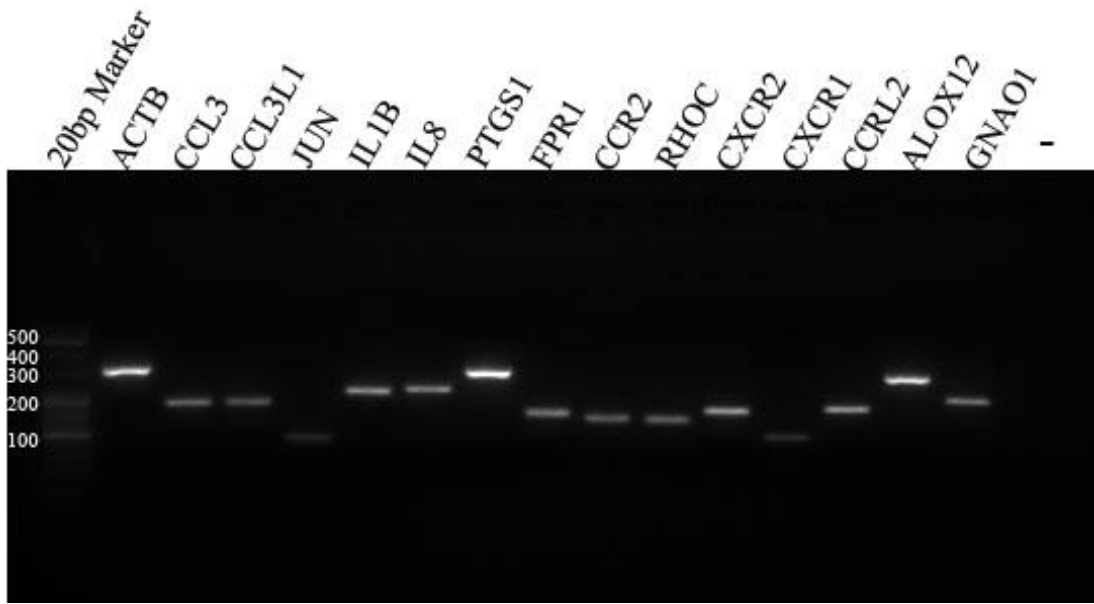

**S-Figure 3. Agarose gel electrophoresis of amplification products**  
 The quality of amplification products was accessed by 2% agarose gel.

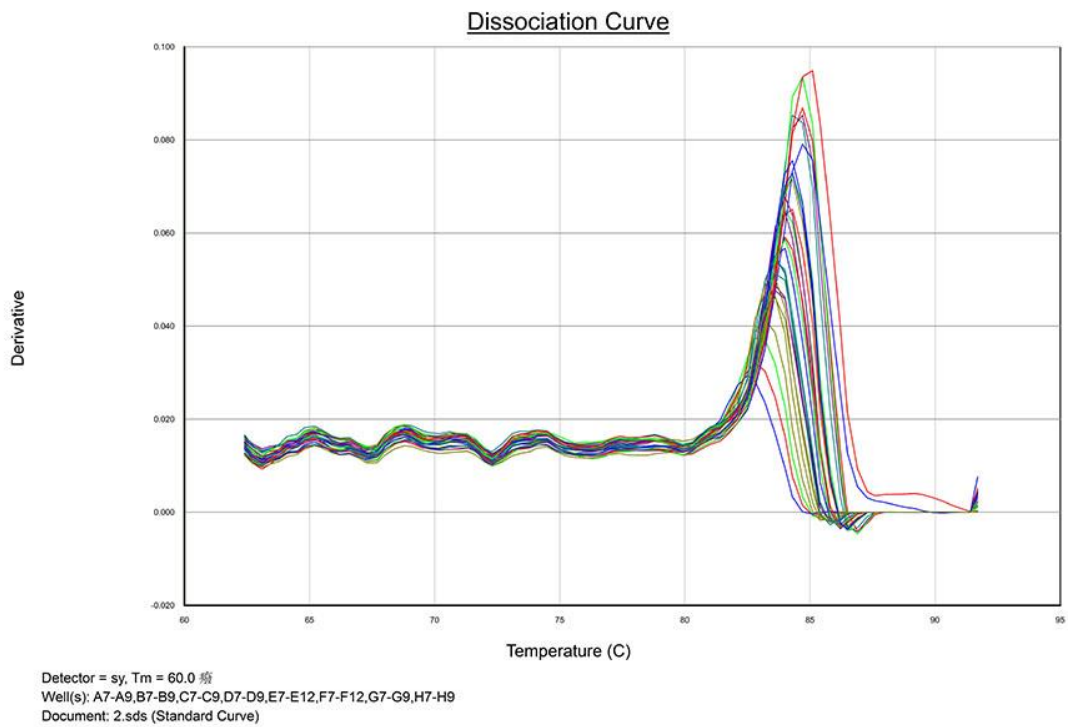

**S-Figure 4. Dissociation curve of amplification products**  
 The quality of the amplification products was accessed by dissociation curve.
